## 1 **Mechanochemical feedback and control of endocytosis and membrane tension**

2 Joseph Jose Thottacherry<sup>1</sup>, Anita Joanna Kosmalka<sup>2,3</sup>, Alberto Elosegui-Artola<sup>2,3</sup>,  
3 Susav Pradhan<sup>4</sup>, Sumit Sharma<sup>5</sup>, Parvinder P. Singh<sup>5</sup>, Marta C. Guadamillas<sup>6</sup>, Natasha  
4 Chaudhary<sup>7,8</sup>, Ram Vishwakarma<sup>5</sup>, Xavier Trepas<sup>2,3,9</sup>, Miguel A. del Pozo<sup>6</sup>, Robert  
5 G. Parton<sup>7</sup>, Pramod Pullarkat<sup>4</sup>, Pere Roca-Cusachs<sup>2,3</sup>, Satyajit Mayor\*<sup>1,10</sup>

6 <sup>1</sup>National Centre for Biological Sciences (NCBS), Tata Institute of Fundamental  
7 Research (TIFR), Bellary Road, Bengaluru 560065, India.

8 <sup>2</sup>Institute for Bioengineering of Catalonia (IBEC), Barcelona 08028, Spain.

9 <sup>3</sup>University of Barcelona, Barcelona 08036, Spain.

10 <sup>4</sup>Raman Research Institute, C. V. Raman Avenue, Bengaluru 560080, India.

11 <sup>5</sup>CSIR - Indian Institute of Integrative Medicine, Jammu 180001, India.

12 <sup>6</sup>Integrin Signalling Lab, Cell Biology & Physiology Program; Cell & Developmental  
13 Biology Area, Centro Nacional de Investigaciones Cardiovasculares Carlos III  
14 (CNIC), Madrid, Spain.

15 <sup>7</sup>University of Queensland, Institute for Molecular Bioscience and Centre for  
16 Microscopy and Microanalysis, St Lucia QLD 4072, Australia.

17 <sup>8</sup>Department of Biochemistry, Weill Cornell Medical College, New York, NY 10065.

18 <sup>9</sup>Centro de Investigación Biomédica en Red en Bioingeniería, Biomateriales y  
19 Nanomedicina (CIBER-BBN) and Institució Catalana de Recerca i Estudis Avançats  
20 (ICREA), Barcelona 08010, Spain

21 <sup>10</sup>Institute for Stem Cell Biology and Regenerative Medicine, Tata Institute of  
22 Fundamental Research (TIFR), Bengaluru 560065, India.

23 \*Correspondence should be addressed to S.M ([mayor@ncbs.res.in](mailto:mayor@ncbs.res.in)).

## 24 **Abstract**

25 **Plasma membrane tension is an important factor that regulates many key**  
26 **cellular processes. Membrane trafficking is tightly coupled to membrane tension**  
27 **and can modulate the latter by addition or removal of the membrane. However,**  
28 **the cellular pathway(s) involved in these processes are poorly understood. Here**  
29 **we find that, among a number of endocytic processes operating simultaneously**  
30 **at the cell surface, a dynamin and clathrin-independent pathway, the**  
31 **CLIC/GEEC (CG) pathway, is rapidly and specifically upregulated upon**  
32 **reduction of tension. On the other hand, inhibition of the CG pathway results in**  
33 **lower membrane tension, while up regulation significantly enhances membrane**  
34 **tension. We find that vinculin, a well-studied mechanotransducer, mediates the**  
35 **tension-dependent regulation of the CG pathway. Vinculin negatively regulates a**  
36 **key CG pathway regulator, GBF1, at the plasma membrane in a tension**  
37 **dependent manner. Thus, the CG pathway operates in a mechanochemical**  
38 **feedback loop with membrane tension potentially leading to homeostatic**  
39 **regulation of plasma membrane tension.**

## 40 **Introduction**

41 Living cells sense and use force for multiple functions like development<sup>1</sup>,  
42 differentiation<sup>2</sup>, gene expression<sup>3</sup>, migration<sup>4</sup> and cancer progression<sup>5</sup>. Cells respond  
43 to changes in tension, passively by creating membrane invaginations/ blebs<sup>6-8</sup> and  
44 actively, by modulating cytoskeletal-membrane connections, mechanosensitive  
45 channels and membrane trafficking<sup>4,9,10</sup>. Membrane trafficking through endo-exocytic  
46 processes can respond and modulate the membrane tension<sup>10</sup>. While exocytosis acts to  
47 reduce plasma membrane tension as a consequence of increasing net membrane area,  
48 endocytosis could function to reduce membrane area and enhance membrane tension.

49 Membrane tension has long been shown to affect the endocytic process. Decreasing  
50 tension upon stimulated secretion or by addition of amphiphilic compounds increases  
51 endocytosis<sup>11 12</sup>. On the other hand, an increase in tension upon hypotonic shock<sup>11</sup> or  
52 as evinced during mitosis<sup>12</sup>, results in a decrease in endocytosis. Increase in  
53 membrane tension on spreading is also compensated via an increase in exocytosis  
54 from endocytic recycling compartment providing extra membrane<sup>13</sup>. Together these  
55 observations suggest that endocytosis responds to changes in membrane tension or  
56 changes in membrane area. However, the specific endocytic mechanisms involved in  
57 these responses have not been elucidated. The well-studied dynamin-dependent,  
58 clathrin-mediated endocytic (CME) pathway is relatively unaffected by changes in  
59 tension<sup>14</sup> while caveolae help to passively buffer membrane tension<sup>7</sup>.

60 We had recently shown that upon relaxing the externally induced strain on cells,  
61 tubule like membrane invaginations termed as ‘reservoirs’ are created<sup>6</sup>. This initial  
62 response is a purely passive mechanical response of the plasma membrane and is also  
63 observed in synthetic lipid membranes. Similar structures are also formed on recovery  
64 from hypo-osmotic shock termed as ‘vacuole like dilations’ (VLDs). VLDs form  
65 passively, similar to reservoirs, albeit different in shape. Subsequent to the formation  
66 of either reservoirs or VLDs, cells engage in an active ATP-dependent response that  
67 occurs efficiently only at physiological temperatures to restore their morphology and  
68 membrane tension<sup>6</sup>. This indicates the deployment of specific active cellular  
69 processes following the passive response (see the cartoon in Fig 1a).

70 Here we have explored the nature of such active responses. We have tested the  
71 functioning of multiple endocytic pathways on modulation of membrane tension by  
72 different approaches. In parallel, we have determined the effects of modulating  
73 endocytic processes on membrane tension by utilizing optical or magnetic tweezers to  
74 measure membrane tension. Subsequent to the passive membrane response we had  
75 observed earlier<sup>6</sup>, we find that a clathrin, caveolin and dynamin-independent  
76 endocytic mechanism, the CLIC/GEEC (CG) pathway, rapidly responds to changes in  
77 membrane tension, acting to restore it to a specific set point. Perturbing the CG  
78 pathway directly modulates membrane tension forming a negative feedback loop with  
79 membrane tension to maintain homeostasis. A previously identified mechanical  
80 transducer, vinculin, is involved in the homeostatic control of tension; in its absence  
81 the CG pathway fails to respond to changes in membrane tension, thereby altering the  
82 set point.

### 83 **RESULTS:**

#### 84 **A rapid endocytic response to changes in membrane tension**

85 Active cellular processes are involved in resorbing the ‘reservoirs’ or ‘VLDs’ formed  
86 following a strain relaxation<sup>6</sup>. To determine whether endocytosis could be one such  
87 active process, we monitored the extent of endocytosis by providing a timed pulse of  
88 a fluid-phase marker, fluorescent-dextran (F-Dex), during and immediately after the  
89 stretch-relax procedure (using a custom built stretch device<sup>6</sup> shown in Fig. 1b).  
90 Compared to cells at steady state, there was a dramatic increase in fluid-phase  
91 endocytosis immediately after relaxation of the strain (Fig. 1c) while uptake was  
92 markedly reduced during the application of the strain (Supplementary Fig. 1a). This  
93 increase in endocytosis was transient and disappeared as early as 90 seconds after  
94 strain relaxation (Fig. 1c). This also corresponds to the time scale of resorption of  
95 reservoirs by an active process observed earlier<sup>6</sup>. By rapidly upregulating endocytosis,  
96 cells thus respond to a net decrease in tension in a fast, transient fashion returning  
97 swiftly to a steady state.

98 Earlier studies indicated that exocytosis helped add membrane rapidly in response to  
99 increased membrane tension during cell spreading<sup>15</sup>. On deadhering, cells round off  
100 decreasing their surface area while on replating, cells spread by adding membrane.  
101 Thus it is likely that endocytic pathways could help retrieve membrane on deadhering  
102 due to decrease in net membrane tension<sup>8,16</sup>. We reasoned that if an endocytic process  
103 is responding to the release of strain during the deadhering process, it would be  
104 upregulated during the detachment process. To monitor the extent of endocytosis we  
105 followed the uptake of a timed pulse of F-Dex during and immediately after the  
106 detachment (3 minutes) and compared it to that measured in the spread state (Fig. 1d  
107 schematic). Our results showed that the net fluid-phase uptake underwent a rapid  
108 increase while the cells were de-adhering (3 minutes), but subsided back to the steady  
109 state level once it was de-adhered and held in suspension (Fig. 1d). Recycling of the  
110 endocytic material is similar between steady state and deadhering (Supplementary  
111 Fig. 1b). This indicates that there is no block in the recycling rate during deadhering  
112 and increase in uptake on deadhering is due to a transient increase in endocytic  
113 potential.

114 To further consolidate our findings, we used an alternate method to alter membrane  
115 tension. We shifted cells from hypotonic to isotonic medium, which made passive

116 invaginations similar to reservoirs called VLD's<sup>6</sup>. This method also results in an  
117 enhancement of fluid-phase endocytosis (Supplementary Fig. 1c), consistent with the  
118 results obtained by the other two methods of altering membrane tension. Together  
119 these results suggest that reduction of membrane tension via a number of different  
120 methods triggered a fast and transient endocytic response on the time scale of  
121 seconds.

## 122 **Membrane tension and the response of multiple endocytic pathways**

123 To ascertain which of the multiple endocytic pathways respond to changes in tension,  
124 we examined cargo previously shown to be endocytosed via these distinct pathways.  
125 A number of endocytic pathways function concurrently at the cell surface<sup>17-20</sup>. In  
126 addition to the well characterized CME pathway, there are pathways that are  
127 independent of clathrin but utilize dynamin for vesicle pinching<sup>19,21</sup>. Additionally,  
128 there are clathrin and dynamin independent pathways which function in a number of  
129 cell lines<sup>22-24</sup>, but not in all<sup>25</sup>. The CLIC/GEEC (clathrin independent carrier/ GPI-  
130 anchored protein enriched early endosomal compartment) pathway is a clathrin and  
131 dynamin-independent pathway, responsible for the internalization of a major fraction  
132 of the fluid-phase and several GPI-anchored proteins (GPI-AP)<sup>22,24</sup>, and other plasma  
133 membrane proteins such as CD44<sup>26</sup>. Therefore, we used these specific cargoes to test  
134 the response of different endocytic pathways while membrane tension was altered.

135 The endocytic uptake of the transferrin receptor (TfR), a marker of CME, did not  
136 increase in the cells which exhibited a transient rise in the fluid-phase after a  
137 hypotonic shock (Fig 2a) or detachment (Fig. 2b) as visualized using two color  
138 fluorescence microscopy. However, uptake of the folate receptor, a GPI-AP that is  
139 internalized via the CG pathway<sup>27,28</sup>, exhibited a considerable increase (Fig. 2c). This  
140 indicated that clathrin-independent endocytosis rather than CME might be involved in  
141 the fast response to a decrease in membrane tension.

142 There are endocytic pathways which utilize dynamin independent of clathrin  
143 function<sup>19,22</sup>. Therefore we tested whether the increase in fluid-phase uptake requires  
144 dynamin function. We used a conditional triple knock out cell line that removes  
145 Dynamin 1, 2 and 3 from the genome<sup>29</sup>, thereby abolishing all the dynamin-mediated  
146 endocytic pathways (Supplementary Fig. 2a). The dynamin triple knockout mouse  
147 embryonic fibroblasts (MEFs) shows higher steady state fluid-phase endocytosis<sup>29</sup>.  
148 However, cells lacking all forms of dynamin also transiently increased their fluid-  
149 phase endocytosis upon both stretch-relax cycles to the same extent as wild type  
150 (WT)-MEFs (Fig. 3a) and hypotonic/isotonic media changes (Supplementary Fig. 2b).  
151 Thus, neither CME nor dynamin-dependent endocytic pathways appear to respond to  
152 an acute reduction in membrane tension.

153 A caveolin-dependent endocytic process is important to retrieve specialized  
154 membrane on deadhering<sup>30</sup>, and a caveolae-mediated passive mechanism is reported  
155 to buffer the increase in membrane tension and prevent cell lysis triggered by the  
156 flattening of caveolae<sup>7</sup>. To test if caveolin-dependent endocytic mechanisms could be  
157 important for this rapid endocytic up-regulation, caveolin null MEFs were subjected  
158 to the stretch-relax protocol. These cells exhibited a transient increase in fluid-phase  
159 uptake similar to their WT controls (Fig. 3a). In addition, caveolin-null cells also  
160 exhibit a fast transient upregulation of fluid-phase endocytosis during de-adhering as  
161 well (Supplementary Fig. 2c).

162 We next examined the morphology of the endocytic carriers formed by reduction of  
163 membrane tension induced by deadhering using electron microscopy (EM). For this,  
164 we utilized Cholera Toxin bound HRP (CTxBHRP), which marks the internalized  
165 plasma membrane. We used a procedure in which the surface remnant peroxidase  
166 reaction product is quenched with ascorbic acid, revealing only the internalized  
167 CTxBHRP labeled membrane<sup>26</sup>. After 5 minutes post-deadhering the major endocytic  
168 structures labeled had the typical morphology of CG carriers (or CLICs) comprising  
169 structures with tubular and ring-shaped morphology (arrows, Supplementary Fig. 2d).  
170 Morphologically-identical structures were also observed in WT MEFs at steady  
171 state<sup>31</sup> and in Cav1<sup>-/-</sup> MEFs (arrows, Supplementary Fig. 2d) consistent with the  
172 observation of fast fluid-phase uptake in Cav1<sup>-/-</sup> cells via CG (Fig. 3a and  
173 Supplementary Fig. 2c). At this time point, surface-connected caveolae (containing no  
174 peroxidase-reaction product) persist in the Cav-expressing WT cells (arrowheads,  
175 Supplementary Fig. 2d), consistent with the possibility that the caveolar pathway does  
176 not play a significant role in transiently modulating endocytosis at these early times of  
177 deadhering.

178 Together, these experiments indicated that the clathrin, dynamin or caveolin  
179 dependent endocytic mechanisms do not exhibit a rapid respond to a reduction in  
180 membrane tension. This is in contrast to fluid-phase or GPI-anchored protein uptake  
181 which is endocytosed via the CG pathway. CG-mediated endocytosis is a high  
182 capacity pathway capable of internalizing the equivalent of the entire plasma  
183 membrane area in 12 minutes<sup>26</sup>, and of recycling a large fraction of endocytosed  
184 material<sup>32</sup>. This pathway is also implicated in the delivery of membrane on cell  
185 spreading in response to increases in membrane tension, thus helping to maintain  
186 membrane homeostasis<sup>9,13</sup>.

### 187 **CLIC/GEEC (CG) pathway responds to membrane tension**

188 Since the CG cargo responded to changes in tension, we explored this finding in  
189 further detail. CG pathway is regulated by small GTPase's, ARF1, its GEF GBF1, and  
190 CDC42 at the plasma membrane<sup>28,33,34</sup>. Hence, we utilized small molecule inhibitors  
191 of CDC42 and GBF1 to acutely inhibit CG pathway<sup>35,36</sup>. The CDC42 inhibitor,  
192 ML141 decreases fluid-phase endocytosis in cells at steady state but not CME  
193 (Supplementary Fig3a), and prevents the increase in fluid-phase uptake upon  
194 deadhering (Supplementary Fig. 3b). In separate experiments, we utilized LG186, an  
195 inhibitor of GBF1, which also decreases fluid-phase endocytosis in cells at steady  
196 state but does not affect CME (Supplementary Fig 3c). Inhibiting GBF1 prevents the  
197 increase in fluid-phase endocytosis observed upon stretch-relax (Fig. 3b) or  
198 deadhering (Supplementary Fig. 3d). Similar to the decrease in fluid-phase on  
199 increasing tension during stretch (Supplementary Fig. 1a), CD44, a CG pathway  
200 specific cargo, shows reduced endocytosis during hypotonic shock (Supplementary  
201 Fig. 3e).

202 To further confirm that this response is due to CG endocytosis, we assessed the effect  
203 of the stretch-relax protocol on cells that lack CG endocytosis. HeLa cells have been  
204 shown to lack a robust CG endocytic pathway<sup>25,27</sup>. While the molecular basis for this  
205 defect is not understood, we find that fluid-phase endocytosis in HeLa cells is not  
206 susceptible to GBF1 inhibition by LG186 (Supplementary Fig. 4a). In addition, these  
207 cells do not show an obvious recruitment of GBF1 to the plasma membrane in the  
208 form of punctae as observed in cells exhibiting constitutive CG endocytosis such as

209 CHO cells as reported earlier<sup>34</sup> (Supplementary Fig 4b/4c). Correspondingly, these  
210 cells did not exhibit a rapid increase in fluid-phase endocytosis on a hypotonic to  
211 isotonic shift (Supplementary Fig. 4d).

212 These experiments, combined with the up-regulated endocytosis of a CG specific  
213 cargo (GPI-AP) (Fig. 2c), suggest that the CG endocytic pathway is specifically  
214 involved in the rapid, transient response to changes in membrane tension.

### 215 **Passive and active membrane response to changes in membrane tension**

216 As mentioned above, upon a rapid reduction in membrane tension, cells form passive  
217 structures such as reservoirs and VLDs similar to the response of an artificial  
218 membrane. Reservoirs are formed upon strain relaxation in the membrane after  
219 stretching cells, whereas VLDs are formed by water expelled by the cell after a hypo-  
220 to-isotonic-shock recovery<sup>6</sup>. Both reservoirs and VLDs are reabsorbed and disappear  
221 within a couple of minutes, coincidental with an increase in endocytosis. This led us  
222 to test if inhibiting the CG pathway could have a measurable impact on the rate of  
223 disappearance of such passive structures. We find that the CG pathway exhibits  
224 exquisite temperature sensitivity and is barely functional at room temperature (RT),  
225 and is not efficient even at 30°C in comparison to CME in CHO cells (Fig. 4a).  
226 Correspondingly, the reservoir resorption in CHO cells was impaired after lowering  
227 temperature (Fig. 4b). In addition, inhibition of the CG pathway in CHO cells by  
228 inhibiting GBF1 reduced the rate of reservoir reabsorption at 37 °C (Fig. 4a). In  
229 contrast, HeLa cells lacking a characteristic CG pathway did not show any difference  
230 in the rate of disappearance of reservoirs upon inhibiting GBF1 and was much less  
231 affected by lowering of temperature than CHO cells (Supplementary Fig. 4e). Thus,  
232 perturbing CG endocytosis affects the kinetics of resorption of reservoirs.

233 We next examined if passively generated structures could help initiate endocytosis at  
234 the sites of their formation. Since the disappearance of each reservoir is gradual and  
235 not as a single step process<sup>6</sup> (Fig. 4b), this indicates that reservoirs are not likely to be  
236 pinched off directly as endosomes. Further, we do not observe endosomes form at the  
237 site of the reservoirs (Supplementary Fig. 5a). To test this, we took advantage of our  
238 earlier observation that cells plated on polyacrylamide gels do not form VLDs upon  
239 hypotonic to isotonic shifts<sup>6</sup>. Whereas the lack of generation of VLDs was confirmed  
240 in our cells grown on polyacrylamide (Supplementary Fig. 5b), the cells still showed  
241 an increase in endocytosis similar to when plated on glass, upon exposure to hypo-to-  
242 isotonic-shock procedure (Supplementary Fig. 5c). Together, these data suggest that  
243 CG endocytosis occurs subsequent to the passive responses of the membrane but the  
244 passive invagination formation is not necessary to form CG endosomes. However, the  
245 transient increase in CG endocytosis following the passive response helps swiftly  
246 resorb the excess membrane helping to restore the membrane morphology.

### 247 **Role of the CG pathway in setting membrane tension**

248 Since the CG endocytic pathway responded to changes in membrane tension we  
249 hypothesized that it might be involved in the setting of steady state membrane tension  
250 as well. To explore this hypothesis, we directly measured tether forces by pulling  
251 membrane tethers using optical tweezers<sup>37</sup>. The force experienced by membrane  
252 tethers provides a way to measure the effective membrane tension<sup>38</sup> (Fig 5a). We  
253 found that acutely inhibiting the CG pathway by inhibiting GBF1 drastically reduced

254 the tether forces in a resting cell (Fig. 5b). To further assess this, we applied 0.5 nN  
255 force pulses using a magnetic tweezer device to ConcanavalinA (ConA)-coated  
256 magnetic beads attached to the cell membrane (Supplementary Fig 5d). Consistent  
257 with optical tweezers results, resistance to force (stiffness) was reduced in GBF1  
258 inhibited cells (Supplementary Fig 5e). That this effect was due to a reduction in  
259 membrane tension and not any effects on the cytoskeleton, was corroborated by the  
260 lack of a change in the measured stiffness of fibronectin-coated beads attached to cells  
261 via integrin-fibronectin adhesions with and without GBF1 inhibition (Supplementary  
262 Fig 5f).

263 We next examined tether forces in cells wherein the CG pathway is up-regulated. We  
264 reasoned that since the Dynamin TKO cells show a higher fluid-phase endocytosis  
265 (Fig. 5c, Supplementary Fig 6c), it is likely that this would increase effective  
266 membrane tension. Tether forces were indeed higher in the Dynamin TKO cells  
267 compared to control cells (Fig. 5d). Consistent with the role of the CG-pathway in  
268 setting membrane tension, inhibiting the CG pathway in Dynamin TKO cells by  
269 GBF1 inhibition (Fig. 5c, Supplementary Fig 5h) reduced the effective membrane  
270 tension below control levels (Fig. 5d).

271 To further confirm this observation, we measured tether forces on acutely increasing  
272 CG endocytosis by using BrefeldinA(BFA) as reported earlier<sup>33</sup>. BFA treatment  
273 disrupts ER to Golgi secretion but also serves to free up ARF1, making it available at  
274 the cell surface to increase CG endocytosis<sup>33</sup>. We further confirm that this increase is  
275 mediated through a GBF1-sensitive CG endocytosis (Fig 5e). We treated the cells  
276 with BFA and measured tether forces using optical tweezers when the increase in  
277 endocytosis was most prominent. Tether forces were higher on treating cells with  
278 BFA compared to the control case (Fig. 5f). BFA treatment inhibits secretion<sup>39</sup> and  
279 this could also increase the effective membrane tension due to a reduction of  
280 membrane delivery from the secretory pathway independent of its effect on CG  
281 endocytosis. To test this, we treated HeLa cells with BFA. BFA treatment disrupted  
282 the Golgi in both CHO and HeLa cells (Supplementary Fig. 5g) consistent with its  
283 inhibition of the secretory pathway. However, neither fluid-phase uptake (Fig. 5e) nor  
284 the tether forces were affected in HeLa cells (Fig. 5f). This indicated that the increase  
285 in tension in CHO cells on BFA treatment is due to an increase in CG endocytosis and  
286 not due to a block in secretion in these timescales.

287 Hence, modulating the CG pathway by activating or inhibiting key regulators  
288 modifies effective membrane tension directly. Since CG pathway is negatively  
289 regulated by membrane tension, this indicates that CG pathway operates in a negative  
290 feedback loop with membrane tension. Since CG pathway is specifically modulated  
291 by tension, it is conceivable that the molecular machinery regulating CG pathway  
292 would be modulated by changes in tension.

### 293 **Mechanical manipulation of the CG endocytosis machinery**

294 We tested if key regulatory molecules involved in different endocytic pathways could  
295 be directly modulated by changes in tension. GBF1 is involved in the CG pathway  
296 and re-localizes from the cytosol to distinct punctae at the plasma membrane upon  
297 activation as visualized using TIRF microscopy<sup>33,34</sup>. We imaged GBF1-GFP  
298 recruitment to the plasma membrane in live cells using TIRF microscopy, during a  
299 hypotonic shock and after recovering from it. GBF1 punctae were lost on hypotonic

300 shock (Fig 6a and 6b) indicating a direct response by GBF1 on increasing tension. On  
301 the other hand, recovery from a hypotonic shock caused the rapid assembly of GBF1  
302 punctae (Fig 6a and Fig 6b). In contrast, clathrin, which is localized from cytosol to  
303 membrane to help in CME is not affected by these similar changes in tension  
304 (Supplementary Fig 6a). These experiments indicated that molecular machinery  
305 involved in regulating the CG pathway was modulated by membrane tension unlike  
306 that of the CME pathway.

### 307 **Vinculin serves as a mechanotransducer for CG endocytosis**

308 For cells to respond to changes in tension, sensing and transduction of this  
309 information must occur. Since focal adhesion related molecules help transduce and  
310 respond to force<sup>5,40,41</sup> we hypothesized these molecules could transduce a physical  
311 stimuli (membrane tension) to regulate endocytic processes as well. Indeed, few of  
312 these proteins were ‘hits’ in a recent RNAi screen for genes that influence CG  
313 endocytosis<sup>42</sup>. Focal adhesion is an intricate macromolecular complex that has  
314 multiple functional modules<sup>43</sup> and vinculin is a critical part of this  
315 mechanotransduction machinery<sup>40,41,43</sup>. Unlike the ‘hits’, Talin or p130CAS, there is  
316 only a single functional isoform of vinculin in non-muscle cells, and cell lines  
317 deficient for this protein are viable. Therefore we used a vinculin null fibroblast cell  
318 line to test the role of this mechanotransducer in the mechano-responsive behavior of  
319 CG pathway.

320 To directly test if vinculin could be involved in the tension-sensitive regulation of the  
321 CG pathway, we stretched vinculin null cells. Unlike WT MEFs that shows ~82%  
322 drop in uptake on stretching (Supplementary Fig 1a), vinculin null cells show only  
323 ~36% drop at the same strain (Fig 7a). Increasing the extent of hypotonic shock  
324 showed a concomitant decrease in fluid-phase endocytosis of WT cells (Fig 7b). By  
325 contrast, vinculin null MEFs were much more refractory to the same extent of  
326 hypotonic shock (Fig 7b). Furthermore, upon strain-relaxation, fluid-phase  
327 endocytosis in vinculin null MEFs did not show an increase (Fig 7a), unlike that  
328 observed for CHO cells (Fig 1c) or wild type MEFs (Fig 3a). This was further tested  
329 in the deadhering assay where vinculin null cells again did not show an increased  
330 fluid-phase uptake, unlike the WT control cells (Supplementary Fig 6c). Thus  
331 vinculin null cells do not respond to changes in tension similar to the WT cells.

332 Fluid-phase uptake in vinculin null MEFs is much higher than wild type cells (Fig  
333 7c). To test if the endocytic effects of vinculin null cells are specifically due to  
334 vinculin, we expressed full length vinculin in vinculin null cells. This caused a  
335 decrease in fluid-phase endocytosis (Supplementary Fig 6d). Further, inhibiting GBF1  
336 in vinculin-null cells with LG186 decreased fluid-phase uptake to the same levels as  
337 cells expressing vinculin, confirming that a GBF1 sensitive CG pathway is functional  
338 here (Supplementary Fig 6d). This indicates that GBF1 operates downstream of  
339 vinculin and vinculin negatively regulates CG pathway.

340 Since vinculin-null cells have a higher basal endocytosis rate it is possible that they  
341 are unable to increase their endocytic capacity further in response to a decrease in  
342 membrane tension. However, vinculin null cells respond to BFA treatment to increase  
343 their endocytic rate in a manner that is also sensitive to GBF1 inhibition, similar to  
344 wild type cells (Supplementary Fig 7a).



345 We next tested if GBF1 shows a tension-dependent membrane localization of GBF1  
346 in vinculin null cells. The level of punctae remained constant and failed to respond to  
347 hypotonic shock (Fig 7d) unlike that observed in WT MEF (Fig 6a). The density of  
348 GBF1 punctae at the plasma membrane was also slightly higher in vinculin null cells  
349 compared to WT cells (Supplementary Fig 6b). This is consistent with higher fluid-  
350 phase endocytosis in vinculin null cells compared to control MEF cell line (Fig 7c).

351 Further, we tested how the steady state membrane tension in vinculin null cells is  
352 compared to WT cells. Tether forces measured using optical tweezers showed a  
353 higher value for vinculin null cells compared to wild type cells (Fig 8a). The high  
354 tether force in cells lacking vinculin was drastically reduced on inhibiting the CG  
355 pathway (Fig 8a), consistent with the role of the CG pathway in regulating the  
356 effective membrane tension. These experiments show that vinculin acts as a negative  
357 regulator of CG pathway and is necessary for the transduction of physical stimuli for  
358 the biochemical control of the CG pathway.

## 359 **DISCUSSION**

360 Membrane tension has been long proposed to be tightly coupled to vesicular  
361 trafficking through endo-exocytic pathways. However, the specific trafficking  
362 mechanisms have remained elusive. Here, we show that membrane tension and CG  
363 endocytosis operate in a negative feedback loop that helps restore any change from a  
364 set point (model: Supplementary Fig. 8b). When membrane tension decreases, it  
365 transiently triggers the CG pathway, bringing about a fast endocytic response to reset  
366 the cell's resting membrane tension. On the other hand, increasing membrane tension  
367 has the opposite effect; the CG endocytosis is inhibited in a proportional manner. The  
368 membrane flux through the CG pathway also has an effect on the effective membrane  
369 tension. Acutely lowering the CG pathway decreases membrane tension while  
370 upregulating the pathway increases membrane tension. Thus, changes in membrane  
371 tension lead to an inverse effect on CG endocytosis, while changes in CG endocytosis  
372 lead to a direct effect on plasma membrane tension. This type of a response known as  
373 a negative feedback loop is used in many different biological contexts to maintain  
374 homeostasis<sup>44</sup>.

375 The CG endocytic pathway specifically responds to acute changes in membrane  
376 tension despite multiple pathways operating simultaneously at the plasma membrane.  
377 Caveolae passively buffer increases in tension<sup>7</sup>, while the clathrin-mediated pathway  
378 concentrates specific ligands and mediates robust endocytosis despite the increase in  
379 tension<sup>14</sup>. De-adhered cells exhibit an increased caveolin-mediated internalization that  
380 persists over hours, and is crucial for the removal of specific membrane constituents  
381 and anchorage-dependent growth and anoikis<sup>30</sup>. On the other hand, unlike the  
382 caveolar pathway, the CG pathway showed a higher transient upregulation of  
383 endocytosis only during deadhering which does not persist in suspension.

384 The fast response of the CG pathway on strain relaxation is lost within 90 seconds.  
385 The loss of this transient response could be even faster as at present 90 seconds is the  
386 dead time in our experiments. Fast clathrin-independent mechanisms have been  
387 reported in different contexts. Ultrafast endocytosis occurs at synapses following a  
388 synaptic vesicle fusion to retrieve the excess membrane. This fast clathrin-  
389 independent but dynamin-dependent process is temperature sensitive as well<sup>45,46</sup>.  
390 Endophilin dependent FEME pathway is another clathrin-independent but dynamin-

391 dependent pathway. HeLa cells seem to predominantly have AP2, GRAF1 and  
392 dynamin-dependent machinery<sup>25</sup>. Consistent with this, inhibiting AP2 or GRAF1 in  
393 HeLa cells inhibits fluid-phase endocytosis. These cells respond in a slower rate to the  
394 changes in osmotic shock and shows blebbing on inhibiting this pathway due to lack  
395 of endocytosis<sup>47</sup>. Here, we find that the GBF1/ARF1/CDC42 dependent CG pathway  
396 shows a fast transient response to changes in tension and is more sensitive to lowering  
397 of physiological temperature compared to the CME pathway. In the absence of such a  
398 fast pathway, other slower endocytic mechanisms operate to internalize the excess  
399 membrane, lack of which might lead to blebbing. The CG pathway helps to swiftly  
400 respond and reset any changes from the steady state, thereby also helping to set the  
401 resting membrane tension of a cell. This indicates that different endocytic pathways  
402 have distinct functions and the CG pathway may be responsible for membrane tension  
403 homeostasis.

404 Similar to the endocytic response, exocytic processes in a cell could modulate and  
405 respond to changes in tension. Exocytic processes in a cell help in addition of  
406 membrane to the cell surface and reduction of membrane tension<sup>9</sup>. Unlike  
407 endocytosis, exocytosis seems to be positively regulated by membrane tension. High  
408 membrane tension increases the exocytic rate and could regulate the mechanism of  
409 vesicle fusion<sup>48,49</sup>. Increase in membrane tension during cell spreading activates  
410 exocytosis to increase spread area through a GPI-anchored protein rich endocytic  
411 recycling compartment<sup>13,15</sup>. This increase in area is independent of secretory pathway  
412 or other exocytic mechanisms. CG pathway takes in a major fraction of GPI-anchored  
413 proteins<sup>27</sup> and recycles a huge fraction of its endocytic volume<sup>32</sup>. On increasing  
414 tension, we find that CG endocytosis is downregulated preventing further increase in  
415 tension but it could be recycling through CG pathway that helps add membrane to  
416 restore the steady state tension (Cartoon: Fig 8b). Thus, regulation of membrane  
417 cycling through the endo-exocytic leg of CG pathway could be important in  
418 membrane homeostasis and further research would help bring about a complete view  
419 of this mechanism.

420 We find that the active response by CG pathway follows the passive response via  
421 membrane invaginations (i.e. reservoirs and VLD) and helps in efficient resorption of  
422 these passive local membrane structures. There could be other active cellular  
423 mechanisms driving the flattening of these invaginations as well. However, these  
424 membrane invaginations are not necessary for the creation of the CG endosomes.  
425 Thus, following a reduction in tension these are two parallel responses by the cell, one  
426 passive and the other active eventually leading to excess membrane internalization  
427 through CG endosomes.

428 Similar to the passive response, physical parameters could directly regulate the active  
429 endocytic machinery by influencing the extent of membrane deformation needed to  
430 make an endocytic vesicle. A higher membrane tension makes it more difficult to  
431 deform the membrane, thus producing fewer endosomes, and vice versa, alleviating  
432 the need for a specific mechanotransduction machinery. However, our results from  
433 studying the vinculin-null cells suggest otherwise. Vinculin, a key focal adhesion  
434 protein, transduces many mechanical inputs at the site of the focal adhesion into  
435 information for the cell to process<sup>41,43,50</sup>. In this context, it appears that vinculin plays  
436 a central role in transducing the increase (or decrease) in membrane tension to the CG  
437 pathway to help inhibit (or activate) its endocytic mechanism (Cartoon: Fig 8b). This

438 appears to be effected by its control of a key regulator of CG endocytosis, GBF1, the  
439 GEF for ARF1. In WT cells, GBF1 forms tension-sensitive punctae at the cell surface  
440 wherein increasing tension abolishes these punctae and decreasing tension increases  
441 it. In the vinculin-null cells, this tension-dependent regulation is lost and CG  
442 endocytosis appears to be uncoupled from tension regulation. Thus, vinculin is  
443 important for a tension-sensitive negative regulation of a key effector of CG pathway,  
444 translating mechanical information into a biochemical read out to influence the  
445 endocytic rate. This negative feedback loop between effective membrane tension and  
446 CG pathway thus is mediated through vinculin and maintains the cells at a lower  
447 effective membrane tension. Different functional modules operate in a focal adhesion  
448 for mechanotransduction<sup>43</sup>. However, the precise mechanism behind the ability for  
449 vinculin to regulate the availability of GBF1 at the cell surface is not yet understood  
450 and is a subject of further investigation.

451 Modulations in membrane tension are used in multiple cellular processes<sup>4,51-54</sup> and  
452 CG pathway could have a role in these. In migrating fibroblasts, CG endosomes are  
453 localized to the leading edge and transient ablation of these endosomes inhibits  
454 efficient migration<sup>26</sup>. Increase in the membrane tension at the leading edge keeps the  
455 neutrophil cells polarized and helps in its migration<sup>54</sup>. In a separate study in  
456 neutrophils, GBF1 localizes to the leading edge by binding to products of  
457 phosphatidylinositol 3-kinase (PI3K), recruits ARF1, and this localization is needed  
458 for unified cell polarity<sup>55</sup>. We have found that PI3K products help recruit GBF1 to the  
459 plasma membrane and this is necessary for CG endocytosis<sup>56</sup>. Thus, one could  
460 speculate that a polarized CG pathway and its regulators operating in migrating cells  
461 could be modulating membrane tension by regulating membrane trafficking.

462 Endocytic pathways are proposed to be at the core of a eukaryotic cellular plan  
463 integrating multiple inputs over spatio-temporal scales<sup>57</sup>. They are also necessary for  
464 tissue patterning: the CG pathway is utilized for Wingless signaling for patterning of  
465 the *Drosophila* wing disc during larval development<sup>56</sup>. Here we find that a high  
466 capacity CG pathway that turns over a huge fraction of the plasma membrane<sup>26,32</sup> and  
467 sensitive to membrane composition<sup>32</sup> is modulated by temperature and  
468 mechanochemical inputs. A vinculin-mediated negative feedback loop between  
469 membrane tension and the CG pathway helps maintain the cell at a lower tension set  
470 point (Cartoon: Fig 8b). This could also help in increasing the potential for  
471 modulating membrane tension to regulate other cellular processes. Thus, the CG  
472 pathway responds and coordinates a variety of cellular inputs including membrane  
473 tension and is likely to function in multiple physiological contexts.

#### 474 **ACKNOWLEDGEMENTS**

475 We thank Pietro De Camilli (Yale University, USA) for conditional Dynamin triple  
476 knock out cell line, Daniel Rösel (Charles University, Prague) for vinculin null cell  
477 line, Darius V Köster for the Caveolin null cell line, David J Stephens (University of  
478 Bristol, UK) for an initial gift of LG186, Feroz M.H. Musthafa (CCAMP, Bangalore),  
479 G.V. Soni (RRI, Bangalore) for help with preparation of PDMS membrane. We  
480 would like to thank Manoj Mathew and central imaging and flow cytometry facility  
481 (CIFF, NCBS) for help with imaging, Dev Kumar (Mech. Workshop) for making  
482 components for stretch relax apparatus and imaging, Dr. Anusuya Banerjee for help  
483 with illustrations, K. Joseph Mathew for final cartoon (Fig 8b), and thank members of  
484 P.P, X.T, and P.R-C laboratories for hosting and helping J.J.T with day-to-day

485 experiments. X.T. acknowledges support from the Spanish Ministry of Economy and  
486 Competitiveness (BFU2015-65074-P), the Generalitat de Catalunya (2014-SGR-927),  
487 and the European Research Council (ERC-2013-CoG-616480). This study was also  
488 supported by grants SAF2014-51876-R from Spanish Ministry of Economy and  
489 Competitiveness (MINECO) and co-funded by FEDER funds to M.A.d.P, and  
490 674/C/2013 from Fundació La Marató de TV3 to P.R-C and M.A.d.P. R.G.P. was  
491 supported by the National Health and Medical Research Council (NHMRC) of  
492 Australia (program grant, APP1037320 and Senior Principal Research Fellowship,  
493 569452), and the Australian Research Council Centre of Excellence (CE140100036).  
494 We acknowledge the Australian Microscopy & Microanalysis Research Facility at the  
495 Center for Microscopy and Microanalysis at The University of Queensland. J.J.T  
496 acknowledges pre-doctoral fellowship from Council for Scientific and Industrial  
497 Research (CSIR), Government of India. S.M would like to acknowledge J.C. Bose  
498 Fellowship from DST, Government of India and Wellcome-DBT Margdarshi  
499 fellowship.

## 500 AUTHOR CONTRIBUTIONS

501 J.J.T and S.M conceived the study. J.J.T, A.J.K, P.P, P.R-C, M.A.d.P, R.G.P and S.M  
502 designed the experiments. J.J.T, A.J.K, A.E-A and N.C performed the experiments  
503 and analyzed them. M.C.G and R.G.P performed the EM experiments designed by  
504 R.G.P and M.A.d.P. S.P and P.P built the optical tweezer setup. X.T and P.R-C  
505 designed and built the stretch system. S.S, P.P.S and R.V synthesized LG186. J.J.T  
506 and S.M wrote the paper.

## 507 References:

- 508 1. Petridou, N. I., Spiró, Z. & Heisenberg, C.-P. Multiscale force sensing in  
509 development. *Nat. Cell Biol.* **19**, 581–588 (2017).
- 510 2. Yim, E. K. & Sheetz, M. P. Force-dependent cell signaling in stem cell  
511 differentiation. *Stem Cell Res. Ther.* **3**, 41 (2012).
- 512 3. Wang, N., Tytell, J. D. & Ingber, D. E. Mechanotransduction at a distance:  
513 mechanically coupling the extracellular matrix with the nucleus. *Nat. Rev. Mol.*  
514 *Cell Biol.* **10**, 75–82 (2009).
- 515 4. Diz-Muñoz, A., Fletcher, D. A. & Weiner, O. D. Use the force: membrane  
516 tension as an organizer of cell shape and motility. *Trends Cell Biol.* **23**, 47–53  
517 (2013).
- 518 5. Seong, J., Wang, N. & Wang, Y. Mechanotransduction at focal adhesions:  
519 From physiology to cancer development. *J. Cell. Mol. Med.* **17**, 597–604  
520 (2013).
- 521 6. Kosmalska, A. J. *et al.* Physical principles of membrane remodelling during  
522 cell mechanoadaptation. *Nat. Commun.* **6**, 7292 (2015).
- 523 7. Sinha, B. *et al.* Cells Respond to Mechanical Stress by Rapid Disassembly of  
524 Caveolae. *Cell* **144**, 402–413 (2011).
- 525 8. Norman, L. L. *et al.* Cell blebbing and membrane area homeostasis in

- 526 spreading and retracting cells. *Biophys. J.* **99**, 1726–33 (2010).
- 527 9. Gauthier, N. C., Masters, T. A. & Sheetz, M. P. Mechanical feedback between  
528 membrane tension and dynamics. *Trends Cell Biol.* **22**, 527–535 (2012).
- 529 10. Apodaca, G. Modulation of membrane traffic by mechanical stimuli. *Am. J.*  
530 *Physiol. Renal Physiol.* **282**, F179-90 (2002).
- 531 11. Dai, J., Ting-Beall, H. P. & Sheetz, M. P. The secretion-coupled endocytosis  
532 correlates with membrane tension changes in RBL 2H3 cells. *J. Gen. Physiol.*  
533 **110**, 1–10 (1997).
- 534 12. Raucher, D. & Sheetz, M. P. Membrane expansion increases endocytosis rate  
535 during mitosis. *J. Cell Biol.* **144**, 497–506 (1999).
- 536 13. Gauthier, N. C., Rossier, O. M., Mathur, A., Hone, J. C. & Sheetz, M. P.  
537 Plasma membrane area increases with spread area by exocytosis of a GPI-  
538 anchored protein compartment. *Mol. Biol. Cell* **20**, 3261–72 (2009).
- 539 14. Boulant, S., Kural, C., Zeeh, J.-C., Ubelmann, F. & Kirchhausen, T. Actin  
540 dynamics counteract membrane tension during clathrin-mediated endocytosis.  
541 *Nat. Cell Biol.* **13**, 1124–31 (2011).
- 542 15. Gauthier, N. C., Fardin, M. A., Roca-Cusachs, P. & Sheetz, M. P. Temporary  
543 increase in plasma membrane tension coordinates the activation of exocytosis  
544 and contraction during cell spreading. *Proc. Natl. Acad. Sci. U. S. A.* **108**,  
545 14467–72 (2011).
- 546 16. Echarri, A. *et al.* Caveolar domain organization and trafficking is regulated by  
547 Abl kinases and mDia1. *J. Cell Sci.* **125**, 3097–113 (2012).
- 548 17. Elkin, S. R., Lakoduk, A. M. & Schmid, S. L. Endocytic pathways and  
549 endosomal trafficking: a primer. *Wien. Med. Wochenschr.* **166**, 196–204  
550 (2016).
- 551 18. Doherty, G. J. & McMahon, H. T. Mechanisms of endocytosis. *Annu. Rev.*  
552 *Biochem.* **78**, 857–902 (2009).
- 553 19. Kumari, S., Mg, S. & Mayor, S. Endocytosis unplugged: multiple ways to enter  
554 the cell. *Cell Res.* **20**, 256–75 (2010).
- 555 20. Robinson, M. S. Forty Years of Clathrin-coated Vesicles. *Traffic* **16**, 1210–38  
556 (2015).
- 557 21. Renard, H.-F. *et al.* Endophilin-A2 functions in membrane scission in clathrin-  
558 independent endocytosis. *Nature* **517**, 493–6 (2015).
- 559 22. Johannes, L., Parton, R. G., Bassereau, P. & Mayor, S. Building endocytic pits  
560 without clathrin. *Nat. Rev. Mol. Cell Biol.* **16**, 311–21 (2015).
- 561 23. Howes, M. T., Mayor, S. & Parton, R. G. Molecules, mechanisms, and cellular  
562 roles of clathrin-independent endocytosis. *Curr. Opin. Cell Biol.* **22**, 519–27

- 563 (2010).
- 564 24. Mayor, S., Parton, R. G. & Donaldson, J. G. Clathrin-independent pathways of  
565 endocytosis. *Cold Spring Harb. Perspect. Biol.* **6**, a016758–a016758 (2014).
- 566 25. Bitsikas, V., Corrêa, I. R. & Nichols, B. J. Clathrin-independent pathways do  
567 not contribute significantly to endocytic flux. *Elife* **3**, e03970 (2014).
- 568 26. Howes, M. T. *et al.* Clathrin-independent carriers form a high capacity  
569 endocytic sorting system at the leading edge of migrating cells. *J. Cell Biol.*  
570 **190**, 675–91 (2010).
- 571 27. Kalia, M. *et al.* Arf6-independent GPI-anchored protein-enriched early  
572 endosomal compartments fuse with sorting endosomes via a  
573 Rab5/phosphatidylinositol-3'-kinase-dependent machinery. *Mol. Biol. Cell* **17**,  
574 3689–704 (2006).
- 575 28. Sabharanjak, S., Sharma, P., Parton, R. G. & Mayor, S. GPI-anchored proteins  
576 are delivered to recycling endosomes via a distinct cdc42-regulated, clathrin-  
577 independent pinocytotic pathway. *Dev. Cell* **2**, 411–23 (2002).
- 578 29. Park, R. J. *et al.* Dynamin triple knockout cells reveal off target effects of  
579 commonly used dynamin inhibitors. *J. Cell Sci.* **126**, 5305–12 (2013).
- 580 30. del Pozo, M. a. *et al.* Phospho-caveolin-1 mediates integrin-regulated  
581 membrane domain internalization. *Nat. Cell Biol.* **7**, 901–8 (2005).
- 582 31. Kirkham, M. *et al.* Ultrastructural identification of uncoated caveolin-  
583 independent early endocytic vehicles. *J. Cell Biol.* **168**, 465–76 (2005).
- 584 32. Chadda, R. *et al.* Cholesterol-sensitive Cdc42 activation regulates actin  
585 polymerization for endocytosis via the GEEC pathway. *Traffic* **8**, 702–17  
586 (2007).
- 587 33. Kumari, S. & Mayor, S. ARF1 is directly involved in dynamin-independent  
588 endocytosis. *Nat. Cell Biol.* **10**, 30–41 (2008).
- 589 34. Gupta, G. D. *et al.* Analysis of Endocytic Pathways in Drosophila Cells  
590 Reveals a Conserved Role for GBF1 in Internalization via GEECs. *PLoS One*  
591 **4**, e6768 (2009).
- 592 35. Hong, L. *et al.* Characterization of a Cdc42 protein inhibitor and its use as a  
593 molecular probe. *J. Biol. Chem.* **288**, 8531–43 (2013).
- 594 36. Boal, F. *et al.* LG186: An inhibitor of GBF1 function that causes Golgi  
595 disassembly in human and canine cells. *Traffic* **11**, 1537–51 (2010).
- 596 37. Dai, J. & Sheetz, M. P. Membrane tether formation from blebbing cells.  
597 *Biophys. J.* **77**, 3363–70 (1999).
- 598 38. Dai, J. & Sheetz, M. P. Mechanical properties of neuronal growth cone  
599 membranes studied by tether formation with laser optical tweezers. *Biophys. J.*

- 600           **68**, 988–96 (1995).
- 601   39.   Miller, S. G., Carnell, L. & Moore, H. H. Post-Golgi membrane traffic:  
602       brefeldin A inhibits export from distal Golgi compartments to the cell surface  
603       but not recycling. *J. Cell Biol.* **118**, 267–83 (1992).
- 604   40.   Iskratsch, T., Wolfenson, H. & Sheetz, M. P. Appreciating force and shape —  
605       the rise of mechanotransduction in cell biology. *Nat. Rev. Mol. Cell Biol.* **15**,  
606       825–833 (2014).
- 607   41.   Janoštiak, R., Pataki, A. C., Brábek, J. & Rösel, D. Mechanosensors in integrin  
608       signaling: The emerging role of p130Cas. *Eur. J. Cell Biol.* **93**, 445–454  
609       (2014).
- 610   42.   Gupta, G. D. *et al.* Population distribution analyses reveal a hierarchy of  
611       molecular players underlying parallel endocytic pathways. *PLoS One* **9**, (2014).
- 612   43.   Stutchbury, B., Atherton, P., Tsang, R., Wang, D.-Y. & Ballestrem, C. Distinct  
613       focal adhesion protein modules control different aspects of  
614       mechanotransduction. *J. Cell Sci.* **130**, 1612–1624 (2017).
- 615   44.   Brandman, O. & Meyer, T. Feedback loops shape cellular signals in space and  
616       time. *Science* **322**, 390–5 (2008).
- 617   45.   Delvendahl, I., Vyleta, N. P., von Gersdorff, H. & Hallermann, S. Fast,  
618       Temperature-Sensitive and Clathrin-Independent Endocytosis at Central  
619       Synapses. *Neuron* **90**, 492–498 (2016).
- 620   46.   Watanabe, S. *et al.* Ultrafast endocytosis at mouse hippocampal synapses.  
621       *Nature* **504**, 242–7 (2013).
- 622   47.   Holst, M. R. *et al.* Clathrin-Independent Endocytosis Suppresses Cancer Cell  
623       Blebbing and Invasion. *Cell Rep.* **20**, 1893–1905 (2017).
- 624   48.   Wen, P. J. *et al.* Actin dynamics provides membrane tension to merge fusing  
625       vesicles into the plasma membrane. *Nat. Commun.* **7**, 12604 (2016).
- 626   49.   Mellander, L. J. *et al.* Two modes of exocytosis in an artificial cell. *Sci. Rep.* **4**,  
627       1–7 (2014).
- 628   50.   Goldmann, W. H. Role of vinculin in cellular mechanotransduction. *Cell Biol.*  
629       *Int.* **40**, 241–256 (2016).
- 630   51.   Pontes, B., Monzo, P. & Gauthier, N. C. Membrane Tension: A Challenging  
631       But Universal Physical Parameter in Cell Biology. *Semin. Cell Dev. Biol.*  
632       (2017). doi:10.1016/j.semcdb.2017.08.030
- 633   52.   Diz-Muñoz, A. *et al.* Membrane Tension Acts Through PLD2 and mTORC2 to  
634       Limit Actin Network Assembly During Neutrophil Migration. *PLOS Biol.* **14**,  
635       e1002474 (2016).
- 636   53.   Togo, T., Krasieva, T. B. & Steinhardt, R. a. A decrease in membrane tension

- 637 precedes successful cell-membrane repair. *Mol. Biol. Cell* **11**, 4339–46 (2000).
- 638 54. Houk, A. R. *et al.* Membrane tension maintains cell polarity by confining  
639 signals to the leading edge during neutrophil migration. *Cell* **148**, 175–188  
640 (2012).
- 641 55. Mazaki, Y., Nishimura, Y. & Sabe, H. GBF1 bears a novel  
642 phosphatidylinositol-phosphate binding module, BP3K, to link PI3K activity  
643 with Arf1 activation involved in GPCR-mediated neutrophil chemotaxis and  
644 superoxide production. *Mol. Biol. Cell* **23**, 2457–2467 (2012).
- 645 56. Hemalatha, A., Prabhakara, C. & Mayor, S. Endocytosis of Wingless via a  
646 dynamin-independent pathway is necessary for signaling in *Drosophila* wing  
647 discs. *Proc. Natl. Acad. Sci.* **113**, E6993–E7002 (2016).
- 648 57. Scita, G. & Di Fiore, P. P. The endocytic matrix. *Nature* **463**, 464–73 (2010).
- 649 58. Datar, A., Bornschlöggl, T., Bassereau, P., Prost, J. & Pullarkat, P. A. Dynamics  
650 of membrane tethers reveal novel aspects of cytoskeleton-membrane  
651 interactions in axons. *Biophys. J.* **108**, 489–497 (2015).
- 652 59. Elosegui-Artola, A. *et al.* Rigidity sensing and adaptation through regulation of  
653 integrin types. *Nat. Mater.* **13**, 631–7 (2014).
- 654 60. Galbraith, C. G., Yamada, K. M. & Sheetz, M. P. The relationship between  
655 force and focal complex development. *J. Cell Biol.* **159**, 695–705 (2002).
- 656
- 657
- 658
- 659



## 660 **FIGURE LEGENDS**

### 661 **Figure 1: A fast transient endocytic response to decrease in membrane tension:**

662 **(a)** Cartoon showing membrane remodeling responses after mechanical strain. Cells  
663 after the stretch and relax protocol forms invaginations termed ‘reservoirs’<sup>6</sup>. These  
664 reservoirs are resorbed in few minutes by an active process and requires ATP. **(b)** The  
665 illustration shows the longitudinal section of a vacuum based equi-bi-axial stretching  
666 device. Cells plated on a PDMS sheet are stretched by the application of controlled  
667 vacuum below the circular PDMS sheet, which stretches it in a calibrated manner.  
668 Releasing the vacuum relaxes the strain on PDMS thus relaxing the cell. Cells plated  
669 on PDMS can be imaged in an upright or inverted microscope as required. **(c)**  
670 Endocytic response on strain relaxation. CHO cells were pulsed for 90 sec with TMR-  
671 Dex at steady state (steady state), immediately on relaxing the stretch (stretch-relax),  
672 or after a waiting time of 90 seconds after relaxing the stretch (stretch-relax-wait).  
673 After the pulse, cells were quickly washed with ice cold buffer and fixed, followed by  
674 imaging on a wide field microscope. Images show representative cells used to  
675 generate the histograms which provide a quantitative measure of the extent of  
676 endocytosis of TMR-Dex for the indicated treatments **(d)** Endocytic response on  
677 deadhering. CHO cells are pulsed with TMR-Dex for 3 minutes in adhered cells  
678 (Spread), during de-adhering (Deadh), or immediately after cells are detached and in  
679 suspension (Suspension) were washed with ice cold buffer, added back to  
680 concanavalin coated glass bottom dishes in ice cold buffer, fixed and imaged on a  
681 wide field microscope. Images and Histogram show the extent of fluid-phase uptake  
682 under the indicated conditions. In each experiment, the data represent the mean  
683 intensity per cell ( $\pm$  S.D) from two different experiments with duplicates containing at  
684 least 100 cells per experiment. \*:  $P < 0.001$ , ns: not significant. Scale bar, 10  $\mu$ m.

### 685 **Figure 2: Endocytic pathways differ in their response to decrease in membrane** 686 **tension:**

687 **(a)** Fluid-phase and transferrin (Tf) uptake in CHO cells on recovery from osmotic  
688 shock. Fluid-phase and Transferrin uptake were monitored in CHO cells under  
689 Isotonic conditions (Iso) or immediately after shifting from the hypotonic to isotonic  
690 state (Hypo-Iso) by incubating cells with A647-Tf (Transferrin) or TMR-Dex (Fluid)  
691 as indicated in Methods. Wide-field images (left) show the extent of endocytosed  
692 fluid-phase in Isotonic or Hypotonic-Isotonic (Hypo-Iso) conditions. Histogram  
693 (right) show the extent of TMR-Dex and A647-Tf endocytosis in the Hypo-Iso  
694 condition normalized to those measured in the isotonic condition (grey dashed line).  
695 **(b)** Fluid-phase and Tf uptake in CHO cells on deadhering. CHO cells were pulsed  
696 with TMR-Dex (Fluid) and A647-Tf (Transferrin) for 3 minutes when the cells are  
697 adherent (Spread) or during detachment (Deadh), and taken for imaging as described  
698 in Methods. Wide-field images (left) show the extent of endocytosed fluid-phase in  
699 Spread and during de-adhering condition (Deadh). Histogram (right) show the extent  
700 of TMR-Dex and A647-Tf endocytosis in the de-adhered condition normalized to that  
701 measured in the Spread condition (grey dashed line). **(c)** GPI-AP and Tf uptake on  
702 deadhering in CHO cells. CHO cells pulsed with fluorescent folate to label cell  
703 surface GPI-anchored folate receptors (GPI-AP) and with A647-Tf (Transferrin) for 3  
704 minutes at 37 °C in normally adherent cells (Spread) or during detachment (Deadh),  
705 and taken for imaging as described in Methods. Wide-field images (left) show the  
706 extent of endocytosed GPI-anchored folate receptor in Spread and during the

707 deadhering condition. Histogram (right) shows the extent of A647-Tf and Folate  
708 receptor endocytosis in the de-adhered condition normalized to those measured in the  
709 Spread condition (grey dashed line). In each experiment, the data represent the mean  
710 intensity per cell ( $\pm$  S.D) from two different experiments with duplicates containing at  
711 least 100 cells per experiment. \*:  $P < 0.001$ , ns: not significant. Scale bar, 10  $\mu$ m.

712 **Figure 3: CLIC/GEEC (CG) pathway is the primary pathway for fast endocytic**  
713 **response:**

714 (a) Endocytic response in WT, dynamin TKO, and caveolin null MEFs on stretch-  
715 relax. Wild type MEF (WT MEF), Caveolin<sup>-/-</sup> (Cav<sup>-/-</sup>), or conditional Dynamin triple  
716 knock out cells (Dyn TKO) were pulsed for 90 sec with TMR-Dex at steady state,  
717 immediately after relaxing the stretch (stretch-relax), and quickly washed with ice  
718 cold buffer, fixed and imaged on a wide field microscope. Images (left) show  
719 representative cells used to generate the histograms (right) which provide a  
720 quantitative measure of the extent of endocytosis of TMR-Dex for the indicated  
721 treatments. The uptake on stretch-relax in each cell line is plotted normalized to the  
722 steady state uptake in the respective cell lines (grey dashed line). (b) Inhibition of CG  
723 pathway and endocytosis on stretch-relax. CHO cells were treated with DMSO  
724 (Control) or with LG186 (10  $\mu$ g/ml) to inhibit GBF1 for 30 minutes prior to pulsing  
725 with TMR-Dex for 90 sec, either at steady state (steady state), or immediately after  
726 relaxing the stretch (stretch-relax), and quickly washed with ice cold buffer, fixed and  
727 imaged on a wide field microscope. Images show representative cells used to generate  
728 the histograms (right) which provide a quantitative measure of the extent of  
729 endocytosis of TMR-Dex for the indicated treatments, normalized to the control  
730 steady state condition (grey dashed line). In each experiment, the data represent the  
731 mean intensity per cell ( $\pm$  S.D) from two different experiments with duplicates  
732 containing at least 100 cells per experiment. \*:  $P < 0.001$ , ns: not significant. Scale  
733 bar, 10  $\mu$ m.

734 **Figure 4: Temperature dependence of CG pathway and reservoir resorption:**

735 (a) Endocytosis of fluid-phase and Tf with temperature. CHO cells pre-equilibrated  
736 at the indicated temperatures were pulsed with TMR-Dex (Fluid) and Tf-A647  
737 (Transferrin) for 5 minutes at the respective temperatures, and the extent of  
738 endocytosis of the two probes were quantified and normalized to those obtained at 37  
739  $^{\circ}$ C (grey dashed line). Representative images (left) of cells used to generate the  
740 histogram (right) (mean $\pm$  S.D) were obtained from two different experiments with  
741 duplicates each containing at least 100 cells per experiment. Scale bar, 10  $\mu$ m. (b)  
742 Reservoir resorption on inhibiting CG pathway and decreasing temperature. The  
743 reservoir fluorescence intensity after stretch relax of CHO cells transfected with a  
744 fluorescent membrane marker (pEYFP-mem) was quantified as a function of time at  
745 37 $^{\circ}$ C in the absence (37 $^{\circ}$ C control) or presence of LG186 (37 $^{\circ}$ C inhibitor), or at room  
746 temperature (26 $^{\circ}$ C control). Each point represents mean  $\pm$  S.E.M from more than 100  
747 reservoirs from at least 10 cells. Scale bar, 10  $\mu$ m.

748 **Figure 5: CG pathway regulates membrane tension:**

749 (a) Cartoon shows a membrane tether attached to a polystyrene bead trapped in an  
750 optical trap, used to measure tether forces. The polystyrene bead is held using a laser  
751 based optical trap to pull membrane tethers from cells. Displacement of the bead from

752 the center of the trap ( $\Delta x$ ) gives an estimate of the tether force ( $F$ ) of the cell using the  
753 Hook's law ( $F = -k \cdot \Delta x$ ; where  $k$  is the spring constant or trap stiffness; see methods).  
754 Membrane tension is obtained from the steady state force as  $\sigma = F^2 / (8\pi^2 B)$ , where  $B$   
755 is the bending modulus of the membrane and  $F$  is the tether force<sup>58</sup>. **(b)** Tether forces  
756 on downregulating CG pathway by GBF1 inhibition. Membrane tethers were pulled  
757 from CHO cells pre-treated with DMSO (CHO Control) or LG186 (CHO LG186) for  
758 30 minutes, and maintained at 37 °C during the measurement. Tether forces were  
759 calculated as indicated above. The box plot shows data points with each point  
760 corresponding to a tether per cell with data combined ( $n = 16$  (CHO control) and 19  
761 (CHO LG186)) from two different experiments. **(c, d)** Endocytosis **(c)** and tether  
762 forces **(d)** in dynamin TKO cells. Wild type (WT) MEF, or conditional Dynamin  
763 TKO cells were either pre-treated with DMSO or LG186 and were pulsed for 5  
764 minutes with TMR-Dex and taken for imaging **(c)** or directly taken to measure tether  
765 forces **(d)**. The histograms shows fluid-phase uptake normalized to that observed in  
766 untreated WT MEF cells **(c)** and box plot shows tether forces **(d)** measured in the  
767 indicated conditions ( $n = 25$  (WT MEF), 19 (DYN TKO) and 22 DYN TKO LG186)).  
768 **(e)** Endocytosis on modulating CG pathway. CHO cells were treated without BFA  
769 (Control), or with BFA (20 $\mu$ g/ml) alone or with LG186 for 30 minutes, and then  
770 directly incubated with TMR-Dex for 5 minutes, and imaged on a wide field  
771 microscope. The histogram shows fluid-phase uptake per cell normalized to control  
772 treated CHO cells (Dashed grey line). HeLa cells were correspondingly treated with  
773 BFA and the histogram shows the extent of fluid-phase uptake under the indicated  
774 conditions, normalized to that observed in untreated HeLa cells. **(f)** Box plot shows  
775 tether forces measured in CHO or HeLa cells treated without (Control) or with BFA  
776 for 45 minutes ( $n = 17$  (CHO Control), 23 (CHO BFA), 18 (HeLa Control), 19 (HeLa  
777 BFA)). **(c, e)** In each endocytosis experiment, the data represent the mean intensity  
778 per cell ( $\pm$  S.D) from two different experiments with duplicates containing at least  
779 100 cells per experiment. \*:  $P < 0.001$ , ns: not significant.

## 780 **Figure 6: Mechanical modulation of CG molecular machinery**

781 **(a)** WT- MEF cells transfected with GBF1-GFP were imaged live by TIRF  
782 microscopy. They exhibit GBF1-punctae at the plasma membrane, which is  
783 modulated by alterations in osmolarity obtained by changing the media from isotonic  
784 (Iso) to 40% hypotonic (Hypo) and back to isotonic (Iso). **(b)** Quantification of the  
785 number of punctae per cell during hypotonic shock and subsequent shift to isotonic  
786 medium. The GBF1 spots upon hypotonic shock and subsequent shift to isotonic  
787 medium is normalized to number of spots in the respective cell determined before  
788 hypotonic shift and plotted as a box plot. Each data point is a measurement from a  
789 single cell and box plot shows data of 12 cells from two independent experiments.  
790 Scale bar, 10  $\mu$ m.

## 791 **Figure 7: Vinculin dependent mechanoregulation of CG pathway**

792 **(a)** Vinculin null cells were pulsed for 90 seconds with F-Dex either during a 6%  
793 stretch or on relaxing this strain. Fluid-phase uptake per cell during this strain change  
794 is normalized to uptake in steady state cells for the same time point, and plotted in the  
795 left panel. Representative images are shown in the right panel. **(b)** WT MEF (left  
796 panel) and vinculin null cells (right panel) are pulsed with F-Dex for 2 minutes in  
797 increasing hypotonic medium as indicated, washed, fixed and imaged. Average  
798 uptake per cell in the indicated hypotonic media was normalized to the average uptake

799 of the isotonic condition and plotted as a box plot. Note while fluid-phase uptake is  
800 inhibited in WT MEF cells proportional to the increase in hypotonicity, vinculin null  
801 cells are refractory to much higher hypotonicity. **(c)** WT or vinculin null MEFs are  
802 pulsed with F-Dex for 3 minutes as described before at 37°C. Left panel shows  
803 quantification of uptake per cell normalized to the WT levels and right panel shows  
804 the representative images of the same. In each endocytosis experiment, the data  
805 represent the mean intensity per cell ( $\pm$  S.D) from 2 independent experiments  
806 with each with two technical duplicates containing at least 100 cell per  
807 experiment. \*:  $P < 0.001$ , ns: not significant. Scale bar, 10  $\mu$ m. **(d)** Vinculin null  
808 cells transfected with GBF1-GFP and imaged live using TIRF microscopy while  
809 changing media from isotonic (Iso) to 40% hypotonic (Hypo) and back to isotonic  
810 (Iso). GBF1 organization at plasma membrane during the osmotic shifts is shown in a  
811 representative cell (left panel). Quantification of the number of punctae per cell  
812 during hypotonic and isotonic shifts is normalized to number of spots (Grey dotted  
813 line) before hypotonic shift of the respective cells is plotted as a box plot (right  
814 panel). Each data point is measurement from a single cell and box plot shows data of  
815 13 cells from two independent experiments. Scale bar, 10  $\mu$ m.

## 816 **Figure 8: Membrane tension and Vinculin**

817 **(a)** WT (Vin +/+) or vinculin null cells (Vin -/-) were treated with LG186 to inhibit  
818 GBF1 mediated CG pathway and membrane tension measured using optical tweezer  
819 as described before and compared to the control treated cells. (n = 20 (Vin +/+), 25  
820 (Vin +/+ with LG186), 25 (Vin -/-) and 29 (Vin -/- with LG186)). Vinculin null cells  
821 shows a higher basal membrane tension compared to WT MEF; inhibiting the CG  
822 pathway drastically reduced membrane tension in both cell lines. **(b)** CG pathway and  
823 membrane tension operates in a vinculin dependent negative feedback loop to  
824 maintain homeostasis. Reduction of tension from its steady state leads to a passive  
825 response by the formation of reservoirs or VLDs. The decrease in the effective  
826 tension inactivates a vinculin-dependent machinery, resulting in an increase in active  
827 GBF1, which increases the CG pathway and rapid internalization of the excess  
828 membrane. This is a fast transient response that appears to restore the steady state. On  
829 the other hand, increasing the membrane tension from steady state activates vinculin  
830 dependent machinery, inhibiting the CG pathway, via the reduction of GBF1  
831 recruitment. The increase in effective tension could also activate exocytic machinery  
832 which adds membrane resulting in restoration of the steady state. Thus, a vinculin  
833 dependent mechanochemical-regulation of the CG pathway through a negative  
834 feedback loop helps in maintaining plasma membrane tension homeostasis.  
835

## 836 SUPPLEMENTARY FIGURE LEGENDS

837 **Supplementary Figure 1:** (a) Fluid-phase endocytosis is inhibited on stretching of  
838 cells. WT – MEF cells grown on the PDMS device as detailed in Methods, were  
839 subjected to 6% strain and pulsed for 90 seconds with TMR-Dextran (TMR-Dex)  
840 under the stretched condition (stretch), fixed and imaged. Fluorescence intensity is  
841 compared to the cells that were not subjected to the strain (control) cells pulsed for 90  
842 seconds. (b) Recycling of the fluid-phase is not affected during deadhering. Cartoon  
843 describes the pulse chase protocol used to look at recycling during deadhering. CHO  
844 cells are pulsed with TMR-Dex for 2 minutes, washed and chased for 5 minutes either  
845 in their adhered steady state (Spread) or during de-adhering (Deadh) were washed,  
846 fixed, and imaged. Histogram (right) shows TMR-Dex remaining in the cells after  
847 chase in the deadhering or in spread condition normalized to the spread condition. (c)  
848 Shifting from hypotonic to isotonic media results in an increase in fluid-phase uptake.  
849 Cells were pulsed with TMR-Dex for 1 minute either in steady state (Iso) or after  
850 hypotonic shock (hypo-iso) for one minute. Images (left) of endocytosed TMR-Dex  
851 and histogram (right) show the extent of fluid-phase uptake. In each experiment, the  
852 data represent the mean intensity per cell ( $\pm$  S.D) from two different experiments with  
853 duplicates containing at least 100 cells per experiment. \*:  $P < 0.001$ , ns: not  
854 significant. Scale bar, 10  $\mu$ m.

855 **Supplementary Figure 2:** (a) Dynamin TKO cells as detailed in Methods (Dyn  
856 TKO), or (Control) was pulsed with Tf-A568 for 5minute, surface stripped, labelled  
857 with antibody against transferrin receptor (TfR), washed and fixed. Transferrin (Tf)  
858 uptake normalized to the TfR levels is plotted in the histogram (right top) along with  
859 the surface TfR normalized to the control (right bottom), determined per cell.  
860 Corresponding wide field images show extent of endocytosed TfR (top) and surface  
861 TfR (bottom). Note that removal of all Dynamin isoforms inhibits transferrin uptake  
862 comprehensively while increasing surface levels of TfR. (b) Dynamin TKO cells (as  
863 in panel a) were pulsed with TMR-Dex for 1 minute either in steady state (control) or  
864 after hypotonic shock (hypo-iso). Wide-field images (left) show extent of TMR-Dex  
865 uptake and the histogram (right) shows fluid-phase uptake per cell in hypo-iso  
866 condition normalized to the control. Note while uptake of TfR is completely inhibited  
867 (a), fluid-phase uptake (b) exhibits a typical increase on shifting from hypotonic to  
868 isotonic conditions in Dynamin TKO cells. (c) MEFs (Cav<sup>-/-</sup>) were pulsed with TMR-  
869 Dex for 3 minutes when they are normally adherent cells (Spread) or during  
870 detachment (Deadh). Wide field images and histogram show the extent of fluid-phase  
871 uptake under these conditions. (d) Electron micrographs of WT-MEF and Cav1<sup>-/-</sup>-  
872 MEF on deadhering show similar CG endosomes. CTxB-HRP uptake for 5 minutes  
873 and processed for DAB reaction as described in methods is done in both wild type  
874 MEF (WT-MEF) and Cav1<sup>-/-</sup> MEF. Arrows show internalized CG carriers in both  
875 cell types and arrow head show surface connected caveolae in de-adhered WT cells  
876 (inset shows zoomed in image).

877 In each experiment, the data represent mean intensity per cell ( $\pm$  S.D) from two  
878 different experiments each with technical duplicates containing at least 100 cells per  
879 experiment. \*:  $P < 0.001$ . Scale bar, 10  $\mu$ m (a, b, c), 500nm (d).

880 **Supplementary Figure 3:** (a) ML141, a small molecule inhibitor of CDC42, inhibits  
881 fluid-phase uptake but not transferrin uptake at steady state. CHO cells treated  
882 without (Control) or with ML141 (10 $\mu$ M) for 45 minutes were pulsed for 5 minutes

883 with TMR-Dex (Fluid) and A488-Tf (Tf), washed and surface-stripped of remnant-  
884 cell surface Tf. These cells were incubated with A647-labelled OKT9 antibody on ice  
885 to detect surface transferrin receptor (TfR Surface). Wide field images of cells (left)  
886 and the histogram of total fluid-phase and Tf uptake normalized to surface receptor  
887 level shows that the effect of ML141 was only on the fluid-phase uptake but not on  
888 TfR endocytosis. **(b)** Inhibiting CG pathway using ML141 prevents increase in fluid-  
889 phase uptake on deadhering. Adherent CHO cells treated without (Control) or with  
890 ML141 (10 $\mu$ M) for 45 minutes were pulsed for 5 minutes with TMR-Dex without  
891 detachment (Spread) or during the deadhering process (Deadh), and washed  
892 extensively, fixed and taken for imaging. Images (left) of endocytosed TMR-Dex and  
893 histogram (right) show the extent of fluid-phase uptake normalized to that observed in  
894 the control spread cells. Note that increase in endocytosis observed while deadhering  
895 is completely abolished upon inhibition of CG endocytosis by ML141. **(c)** LG186, a  
896 small molecule inhibitor of GBF1, inhibits fluid-phase uptake but not transferrin  
897 uptake. CHO cells treated without (Control) or with LG186 (10 $\mu$ M) for 30 minutes  
898 were pulsed for 5 minutes with TMR-Dex (Fluid) and A488-Tf (Tf), washed  
899 extensively and surface-stripped of remnant-cell surface Tf. These cells were  
900 incubated with A647-labelled OKT9 antibody to detect surface transferrin receptor  
901 (TfR Surface). Wide field images of cells (left) and histogram of total fluid-phase  
902 uptake and Tf uptake normalized to surface receptor level shows that the effect of  
903 LG186 was only on the fluid-phase uptake but not on TfR endocytosis. **(d)** Inhibiting  
904 CG pathway using LG186 prevents increase in fluid-phase uptake on deadhering.  
905 Adherent CHO cells treated without (Control) or with LG186 (10 $\mu$ M) for 30 minutes  
906 were pulsed for 5 minutes with TMR-Dex without detachment (Spread) or during the  
907 deadhering process (Deadh), and washed, fixed and taken for imaging. Images (left)  
908 of endocytosed TMR-Dex and histogram show the extent of fluid-phase normalised to  
909 that observed in the control cells. Note that increase in endocytosis observed while  
910 deadhering is completely abolished upon inhibition of CG endocytosis by inhibiting  
911 GBF1 using LG186. In each experiment, the data represent the mean intensity per cell  
912 ( $\pm$  S.D) from two different experiments with duplicates containing at least 100 cells  
913 per experiment. **(e)** CD44 uptake is inhibited at high tension. WT MEFs were pulsed  
914 CD44 mAb for 2 minutes either in isotonic medium (Iso) or in 75mOsm hypo-  
915 osmotic medium (Hypo) at 37°C, acid washed to strip surface mAb, washed and  
916 labeled with AF-555 secondary antibody. (Histogram (right) shows per cell uptake in  
917 hypo-osmotic situation normalized to the isotonic situation for the representative  
918 images shown on left. Data represents mean $\pm$  S.E.M from three independent  
919 experiments).\*:  $P < 0.001$ , ns: not significant. Scale bar, 10  $\mu$ m.

920 **Supplementary Figure 4:** **(a)** Fluid-phase uptake in HeLa cells is insensitive to  
921 GBF1 inhibition by LG186 treatment. HeLa cells treated without (Control) or with  
922 LG186 (10 $\mu$ M) for 30 minutes were pulsed for 5 minutes with TMR-Dex (Fluid) and  
923 washed extensively, or pulsed with A488-Tf (Tf) and surface-stripped of remnant-cell  
924 surface Tf, followed by labeling with A648-labelled OKT9 antibody to detect surface  
925 transferrin receptor (TfR Surface). Wide field images of cells (left) and histogram of  
926 total fluid-phase uptake and Tf uptake normalized to surface receptor level shows that  
927 LG186 does not have an effect on the fluid-phase uptake and TfR endocytosis in  
928 HeLa cells. Data represent the mean intensity per cell ( $\pm$  S.D) from two different  
929 experiments with duplicates containing at least 100 cells per experiment. Scale bar, 10  
930  $\mu$ m. **(b/c)** GBF1 do not efficiently localize to the plasma membrane nor form punctae.  
931 GBF1-GFP was transfected in either CHO or HeLa cells and imaged in TIRF and in

932 wide field (epi-fluorescence) format. HeLa cells do not show surface punctae  
933 formation unlike CHO cells (b). Quantification of the TIRF to wide field ratio of  
934 GBF1-GFP levels shows (c) that GBF1 translocation to surface is much lower in  
935 HeLa cells. Each point is value from a cell and quantified from two different  
936 experiments ( $n = 23$  (CHO) and  $20$  (HeLa)). (d) Rapid shifting from hypotonic to  
937 isotonic state does not result in an increase in fluid-phase uptake in HeLa Cells. HeLa  
938 cells were pulsed with TMR-Dextran (fluid) for 1 minute either in steady state (Iso) or  
939 after hypotonic shock of one minute (Hypo-Iso). Images (left) of endocytosed TMR-  
940 Dex and histogram show the extent of fluid-phase uptake. Data represent the mean  
941 intensity per cell ( $\pm$  S.D) from two different experiments with duplicates containing at  
942 least 100 cells per experiment. (e) Reservoir adsorption in HeLa cells does not  
943 respond to GBF1 inhibition. The reservoir fluorescence intensity after stretch relax of  
944 HeLa cells transfected with a fluorescent membrane marker (pEYFP-mem) was  
945 quantified as a function of time at  $37^{\circ}\text{C}$  in the absence ( $37^{\circ}\text{C}$  control) or presence of  
946 LG186 ( $37^{\circ}\text{C}$  inhibitor), or at room temperature ( $26^{\circ}\text{C}$  control). Each point represents  
947 mean  $\pm$  s.e.m from more than 200 reservoirs from at least 10 cells. Note while  
948 treatment with LG186 had no effect on the rate of reservoir resorption, lowering of  
949 the temperature also had only a marginal reduction in the rate of resorption. Scale bar,  
950  $10\ \mu\text{m}$ .

951 **Supplementary Figure 5:** (a) Reservoirs formed on stretch-relax does not colocalize  
952 with endosomes. A pH sensitive SecGFP-GPI transfected CHO cells are stretched for  
953 one minute and relaxed in pH 7.4 buffer (pH 7, top left) at  $37^{\circ}\text{C}$  showing formation of  
954 reservoirs as before. The pH is made acidic (pH 5.5) after 30 seconds to quench  
955 surface fluorescence. Only internal vesicles at neutral pH remain fluorescent and thus  
956 helps to capture newly formed endosomes on stretch-relax (pH 5, top right). The  
957 reservoirs does not colocalize with the newly formed endosomes (bottom, insets). (b)  
958 The cells transfected with CAAX-GFP to mark the membrane are plated on glass  
959 (left) or polyacrylamide gels. Cells were incubated with hypo-osmotic medium for  
960 one minute followed by isotonic recovery. Images of VLDs are observed only in the  
961 cells grown on glass. Insets show a magnification of the edge of the cells where VLDs  
962 are expected to form. (c) Endocytic pulse of 90 seconds is done either in isotonic  
963 situation or after release of hypotonic shock of 1 minute in cells plated on glass or gel.  
964 Mean uptake per cell after release of hypotonic shock for either gel or glass is  
965 normalized to its uptake in isotonic conditions (dotted line). Data represent the mean  
966 intensity per cell ( $\pm$  S.D) from two different experiments with duplicates containing at  
967 least 100 cells per experiment. (d) Cartoon depicts a magnetic tweezer set up to  
968 measure membrane stiffness. An electromagnet with a sharpened tip was used to  
969 apply a  $0.5\ \text{nN}$  pulsatory force ( $1\ \text{Hz}$ ) to paramagnetic beads coated with either  
970 fibronectin fragment (FN) or ConcanavalinA (ConA), attached to cells as described in  
971 methods. Bead movement in response to applied force was then tracked, and bead  
972 stiffness was calculated during the first 10 seconds of the measurement in units of  
973  $\text{nN}/\mu\text{m}$ . (e, f) Inhibiting of CG pathway with LG186 lowers membrane stiffness.  
974 ConA (e) or Fibronectin fragment (f) coated paramagnetic beads were attached to  
975 cells treated without (Control) or with LG186 for 30 minute. Beads were pulled using  
976 the magnetic tweezer as described, and membrane stiffness calculated. Note LG186  
977 treatment lowers membrane stiffness only when ConA-coated beads are pulled,  
978 whereas FN-coated beads are unaffected. This indicates that the LG186 treatment  
979 does not disrupt the cortical cytoskeleton that interacts with the integrin-engaged FN-  
980 coated beads, but lowers general membrane tension as experienced by the ConA-

981 coated beads. The box plot shows the stiffness values in nN/ $\mu\text{m}$  in each of the tethers  
982 pulled for the different conditions. **(g)** BrefeldinA (BFA) treatment causes disruption  
983 in GM130 distribution in both HeLa cells and CHO cells. Cells were treated with 20  
984  $\mu\text{g/ml}$  of BFA for 45 minute, fixed, permeabilized and labelled with GM130 antibody  
985 to mark cis-Golgi and imaged on a wide field microscope. BFA treatment disrupts the  
986 peri-nuclear localization in both CHO and HeLa cells, indicating that BFA is  
987 functional in both cell types. **(h)** The increase in fluid-phase uptake in Dynamin TKO  
988 is inhibited by LG186 treatment. WT or Dynamin TKO cells (prepared as described  
989 in methods) were treated with LG186 or with the vehicle (DMSO; Control), and  
990 incubated with TMR-Dex for 5 minutes, washed and fixed prior to imaging on a Wide  
991 Field microscope. The images show that while Dyn TKO cells exhibit a higher fluid-  
992 phase uptake that the WT cells, this uptake is sensitive to the inhibition of GBF1,  
993 confirming that it is the CG endocytosis that has a higher activity in Dynamin TKO  
994 cells (quantified in Fig. 5c). Scale bar, 10  $\mu\text{m}$ .

995 **Supplementary Figure 6:** **(a)** WT cells transfected with clathrin light chain (CLC-  
996 mCherry) was imaged live using TIRF microscopy during osmotic changes as  
997 indicated. Images (Left panel) and graph (right) show the quantification of number of  
998 CLC punctae per cell normalized to the steady state number of punctae from 13 cells.  
999 Note that the number of clathrin pits at the cell surface do not respond to changes in  
1000 tension. Scale bar, 10  $\mu\text{m}$ . **(b)** GBF1 punctae in vinculin null cells are higher. GBF1-  
1001 GFP is transfected in either WT-MEF or vinculin null MEF and imaged in TIRF. The  
1002 number of punctae per cell were counted and normalized to the surface area. The plot  
1003 shows the average number of spots in each cell type normalized to those obtained in  
1004 WT-MEF. Each point in the box plot represents measurements collected from a single  
1005 cell (WT MEF,  $n=12$ ; (VIN NULL,  $n=13$ ), accumulated. **(c)** Cells were pulsed with  
1006 F-Dex either during deadhering or in spread state for 3 minutes and the pulse is  
1007 stopped using ice cold buffer as described before. De-adhered cells are added to vial  
1008 containing ice cold buffer and allowed to attach on a fresh coverslip bottom dish to be  
1009 fixed and imaged. Endosomal intensity per cell is quantified and normalized to the  
1010 intensity of the WT spread. Note that Vinculin null cells show higher endocytosis  
1011 compared to WT cells but does not show increase in uptake on deadhering unlike WT  
1012 cells. **(d)** Vinculin null cells rescued by transfection with WT-Vinculin full length  
1013 (VIN+) and vinculin null cells were treated with LG186 to check sensitivity to GBF1  
1014 inhibition of fluid-phase endocytosis. Cells treated with LG186 for 30 minutes were  
1015 pulsed for 5 minutes with F-Dex, washed, fixed and imaged. Endocytic uptake per  
1016 cell is quantified and after normalizing to the untreated Vin null case (Control) is  
1017 plotted as shown. Note adding back vinculin reduces the fluid-phase uptake. However  
1018 in both in the Vinculin null as well as in the cells in which Vinculin is added back,  
1019 endocytic uptake of the fluid-phase remains sensitive to LG186, indicating a role for  
1020 vinculin in negatively regulating the CG pathway. Data represent the mean intensity  
1021 per cell ( $\pm$  S.D) from two different experiments with technical duplicates with at least  
1022 100 cells per experiment. \*:  $P < 0.001$ , ns: not significant.

1023 **Supplementary Figure 7:** **(a)** Vinculin cells were either untreated (Control) or  
1024 treated with either LG186 (LG186), BFA (BFA) or BFA followed by LG186  
1025 treatment (BFA LG186). Cells were pulsed with F-Dex for 3 minutes and uptake per  
1026 cell quantified as detailed in Methods, normalized to control, and plotted in the  
1027 histogram (left). The histogram and Images (right) show that BFA treatment causes an  
1028 increase in fluid-phase uptake in vinculin null cells and treating with LG186 inhibits



1029 fluid-phase uptake even in BFA treated cells. This indicates that the CG pathway is  
1030 operational and capable of being upregulated in the vinculin null cells. Data represent  
1031 the mean intensity per cell ( $\pm$  S.D) from two different experiments with duplicates  
1032 containing at least 100 cells per experiment. \*:  $P < 0.001$ , ns: not significant. Scale  
1033 bar, 10  $\mu$ m. **(b)** Model for maintaining membrane tension homeostasis. Different  
1034 processes such as endocytosis, hypotonic shock, and adhesion increase effective  
1035 membrane tension (arrow headed line) while exocytosis, hypertonic medium and  
1036 deadhering would reduce the effective membrane tension (bar headed line). This  
1037 effective membrane tension is a physical parameter that activates a vinculin  
1038 dependent mechano-transduction machinery. Depending on the change in tension in  
1039 relation to a steady state set point, this mechanotransduction machinery inhibits the  
1040 activity of GBF1 at the cell surface (red bar headed line). Higher effective membrane  
1041 tension in relation to the steady state would activate vinculin mediated machinery and  
1042 inhibit GBF1. GBF1 levels at the cell surface is crucial for the activity of the CG  
1043 pathway and thus directly regulates the level of the endocytosis (green arrow headed  
1044 line). Thus any modulation of the membrane tension could be balanced by this  
1045 negative feedback loop to maintain tension homeostasis.  
1046

## 1047 **METHODS**

### 1048 **Cell Culture and reagents**

1049 The CHO (Chinese Hamster Ovary) cells stably expressing FR-GPI and human  
1050 transferrin receptor TfR (IA2.2 cells) as described before<sup>33</sup>, HeLa, MEF (Mouse  
1051 embryonic fibroblasts) cells, Caveolin null MEF, conditional null dynamin triple  
1052 knockout MEF, vinculin null MEF were used for the assays. HF12 media (HiMEDIA,  
1053 Mumbai, India) and DMEM (Invitrogen) supplemented with NaHCO<sub>3</sub> and L-  
1054 Glutamin/Penicillin/Streptomycin solution (Sigma Aldrich) was used for growing  
1055 CHO cells and the different MEF lines respectively.

1056 BrefeldinA (BFA) (Sigma Aldrich), ML141 (Tocris Bioscience) and LG186 (see  
1057 synthesis section below) dissolved in DMSO was used at 20 µg/ml, 10µM and 10µM  
1058 respectively. ML141 and LG186 treatment was done for 30 minutes in serum free  
1059 media and maintained during endocytic assays. Tetra methyl rhodamine labelled  
1060 dextran (TMR-Dex) (10,000MW;Molecular probes, Thermofisher Scientific) was  
1061 used at 1mg/ml. 4 – hydroxy tamoxifen (Sigma Aldrich) was used at 3 µM to remove  
1062 Dynamin 1/2/3 from the conditional dynamin triple knockout MEF cells as reported  
1063 previously<sup>29</sup>. TrypLE express (GIBCO, Invitrogen) was used to detach cells  
1064 according to manufacturer's instruction. SYLGARD 184 silicone elastomer kit (Dow  
1065 Corning) was used to make PDMS sheets according to manufacturer's instruction. For  
1066 the reservoir experiments, cells were transfected with a membrane targeting plasmid  
1067 pEYFP-mem (Clontech) using the Neon transfection device according to the  
1068 manufacturer's protocol as described earlier<sup>6</sup>.

### 1069 **Endocytic and Recycling assays on deadhering**

1070 Endocytic assays were done as previously described<sup>28,33</sup> with slight modifications as  
1071 required. Briefly, CG endocytosis was monitored using fluorescent dextran at 1mg/ml  
1072 in medium or fluorescent folate analogue (N<sup>α</sup>-pteroyl-N<sup>ε</sup>-Bodipy<sup>TMR</sup>-L-lysine  
1073 (PLB<sup>TMR</sup>)) in folate free medium for indicated time points at 37°C. Endocytosis of  
1074 TfR was monitored using 10 µg/ml fluorescent transferrin (Tf) at 37°C incubation for  
1075 indicated time points. Endocytosis was stopped using ice cold HEPES based  
1076 buffer(M1) (M1:140mM NaCl, 20mM HEPES, 1mM CaCl<sub>2</sub>, 1mM MgCl<sub>2</sub>, 5mM KCl,  
1077 pH 7.4). To remove surface fluorescence, cells were treated with PI-PLC (50µg/ml,  
1078 1h; GPI-APs) or with ascorbate buffer (160mM sodium ascorbate, 40mM ascorbic  
1079 acid, 1mM MgCl<sub>2</sub>, 1mM CaCl<sub>2</sub>, pH 4.5; Tf) at 4°C and subsequently fixed with 4%  
1080 paraformaldehyde for 10 minutes.

1081 To study endocytosis on deadhering, cells were detached using TrypLE containing  
1082 fluorescent dextran at 1mg/ml concentration for 3 minutes and the detached cells were  
1083 pipetted into an ice cold vial containing M1 buffer to stop the endocytosis. Cells were  
1084 then replated back on coverslip bottom dish maintained at 4°C, fixed, washed and  
1085 imaged. To look at endocytosis in suspension, the cells soon after detaching were  
1086 pipetted into vial containing fluorescent dextran kept at 37°C. The volume was  
1087 adjusted to have a final concentration of 1mg/ml of the TMR-Dex and after 3minutes  
1088 the endocytosis was stopped by shifting vial to ice. The cells are spun down at 4°C  
1089 and then re-plated on coverslip bottom dish coated with ConA, maintained at 4°C,  
1090 fixed, washed and imaged.

1091 To understand recycling of cargo on deadhering, cells were pulsed with F-Dex for 3  
1092 minutes, quickly washed with M1 buffer at room temperature and then detached with  
1093 TrypLE at 37°C for 5minutes, pipetted into vial containing ice cold M1 buffer and  
1094 kept on ice. Cells were then re-plated back on coverslip bottom dish coated with  
1095 ConA maintained at 4°C, fixed, washed and imaged.

1096 For different small molecule inhibitors used, the cells were treated with them for 30  
1097 minutes in serum free media in their respective final concentrations and then medium  
1098 was removed and pulsed with F-Dex at 1mg/ml in serum free media containing the  
1099 inhibitors since the inhibitor activity is reversible. Endocytosis is stopped by washing  
1100 with ice cold M1 buffer, fixed and imaged.

### 1101 **CTxB-HRP uptake, DAB reaction and Electron Microscopy**

1102 WT and Cav<sup>-/-</sup> MEFs were de-adhered at room temperature followed by  
1103 internalization of 4 µg.ml<sup>-1</sup> CTxB-HRP (Invitrogen) at 37°C for 5 minutes, washed  
1104 two times with ice cold PBS followed by incubation on ice for 10 minutes with  
1105 1mg.ml<sup>-1</sup> DAB(Sigma-Aldrich) with 50µM Ascorbic acid. This is followed by a 10  
1106 minute treatment with DAB, Ascorbic acid and 0.012% H<sub>2</sub>O<sub>2</sub> and then washed twice  
1107 with ice cold PBS. Cells were fixed using 2.5% Glutaraldehyde (ProSciTech) at room  
1108 temperature (RT) for 1 hour followed by PBS wash for two times and then washed  
1109 with 0.1M Na cacodylate and left in the same for overnight at 4°C. Cells were  
1110 contrasted with 1% osmium tetroxide and 4% uranyl acetate. Cells were dehydrated in  
1111 successive washes of 70%, 90% and 100% ethanol before embedding using 100%  
1112 LX-112 resin at 60°C overnight. Sections were viewed under a transmission electron  
1113 microscope (JEOL 1011; JEOL Ltd. Tokyo, Japan), and electron micrographs were  
1114 captured with a digital camera (Morada; Olympus) using AnalySIS software  
1115 (Olympus).

### 1116 **Preparation of PDMS membrane ring**

1117 Sylgard 184 silicone elastomer kit comes in two parts which are added in 10 to 1 mix  
1118 ratio between the polydimethylsiloxane base and the curing agent. This is thoroughly  
1119 mixed and degassing is done either using a vacuum desiccator or by centrifugation.  
1120 To prepare PDMS sheets, 7ml of this mixture was added to the middle of a circular  
1121 6inch plate which is spun at 500R.P.M for a minute on a spin coater. This was cured  
1122 at 65°C overnight and then carefully peeled off either after treatment with oxygen  
1123 plasma cleaner for 40 seconds or without treatment. This PDMS sheet is spread  
1124 evenly and tightly placed between rings of the stretcher (Fig 1a). The cells were  
1125 plated in the middle of the PDMS sheet surrounded with water soaked tissue paper to  
1126 retain humidity and prevent drying up of medium. These rings were placed in the  
1127 stretcher and stretched by varying the level of vacuum as needed according to the  
1128 calibration for the experiments.

### 1129 **Stretch and osmolarity experiments**

1130 For the stretch relax experiments, cells plated on PDMS membrane were loaded on  
1131 the cell stretcher system (Fig 1a) within a temperature controlled chamber at 37°C.  
1132 Vacuum was applied beneath the ring containing the PDMS sheet, deforming the  
1133 membrane and stretching the cells plated on the PDMS. The setup was calibrated to  
1134 stretch cells equi-biaxially to cause 6% strain. Medium containing F-Dex was kept at

1135 37°C in a water bath, and used for the endocytic pulse for the indicated time during or  
1136 after stretch (see endocytic protocol above). Control cells were treated in the same  
1137 way except for application of stretch.

1138 For the osmolarity experiments, cells were treated with 50% hypotonic medium made  
1139 with deionized water at 37°C for the indicated time points and then pulsed with F-Dex  
1140 either in hypotonic or isotonic medium as needed. The shock is applied for 60 seconds  
1141 and pulse done for 60 seconds as mentioned. Endocytosis was stopped with ice cold  
1142 M1 buffer, washed, fixed and imaged.

#### 1143 **Optical Tweezer measurements**

1144 Tether forces was measured using an custom built optical tweezer using IR laser  
1145 (CW,1064nm, TEM\_00,1W) along with 100x, 1.3NA oil objective and motorized  
1146 stage on a Olympus IX71 inverted microscope. Polystyrene beads added to the  
1147 imaging chamber were allowed to settle and then held in the optical trap while  
1148 simultaneously imaging through bright field on a coolsnap HQ CCD camera.  
1149 Membrane tethers are formed by attaching the beads to the cells for few seconds and  
1150 by moving the bead away using the piezo stage. The tether is held at a constant length  
1151 and the fluctuation in the trapped bead is detected by using a quadrant photodiode  
1152 which in turn is acquired and saved using a Labview program through a Data  
1153 Acquisition Card (USB-6009 NI). The trap stiffness is calibrated using the power  
1154 spectrum method. The displacement of the bead from the center along with the trap  
1155 stiffness is used to calculate the tether forces live using a custom written Labview  
1156 code.

#### 1157 **Magnetic Tweezer measurements**

1158 Magnetic tweezer measurements were carried out as previously described<sup>59</sup>. Briefly, a  
1159 custom-built electromagnet with a sharpened tip was used to apply a 0.5 nN pulsatory  
1160 force (1 Hz) to paramagnetic beads attached to cells. Paramagnetic beads had been  
1161 previously coated with either the fibronectin fragment FN7-10 or concanavalin A  
1162 (Sigma Aldrich), which bind respectively specifically to integrins and the actin  
1163 cytoskeleton or nonspecifically to the membrane through glycoproteins<sup>60</sup>. Bead  
1164 movement in response to applied force was then tracked, and bead stiffness was  
1165 calculated during the first 10 seconds of the measurement as the transfer function  
1166 between the applied force and the resulting displacement, evaluated at 1 Hz. This  
1167 stiffness thus provides a measure of the resistance to force of the cell-bead adhesion  
1168 in units of nN/μm.

#### 1169 **Synthesis of LG186**

1170 LG186 was synthesized freshly prior to experiments as reported previously<sup>36</sup> with  
1171 slight modification as described below and used at 10μM dissolved in DMSO..

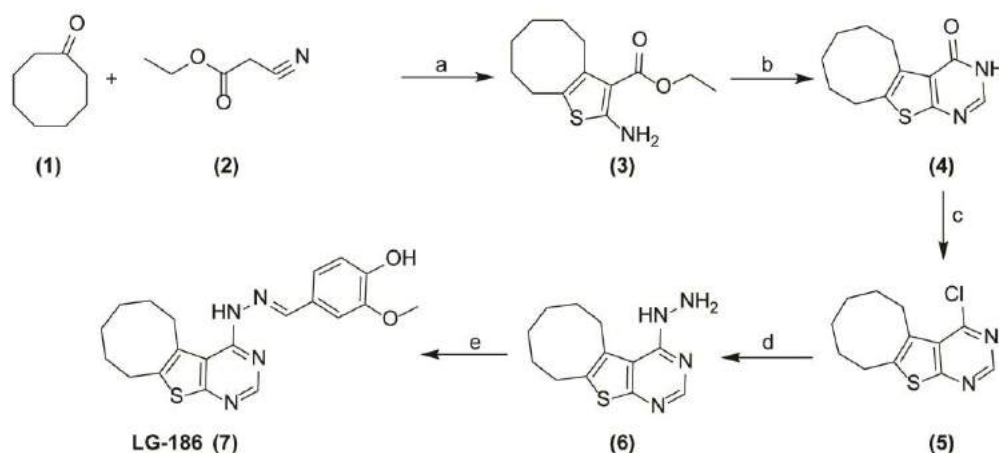

1172

1173

1174

1175

1176

1177

1178

1179

1180

1181

1182

1183

1184

1185

1186

1187

1188

1189

1190

1191

1192

1193

1194

1195

1196

**Reagent and conditions:** Reagents and compounds obtained are mentioned as numbers and the conditions for the reaction are labelled alphabetically along with arrows in figure. a) S<sub>8</sub>, morpholine, ethanol reflux 6 h; b) HCONH<sub>2</sub>, 150°C, 5 h; c) POCl<sub>3</sub>, DMF, rt. d) Hydrazine hydrate, methanol, rt. 2 h; e) Vanillin, rt. 2 h.

**Compound 3:** To a solution of cyclooctanone (**1**) (10 mmol) in ethanol (10 mL) were added sulfur (10 mmol), ethyl cyanoacetate (**2**) (10 mmol) and morpholine (4 mmol). The reaction mixture was stirred at 60°C for 5 h. Upon completion of reaction (checked by TLC), evaporate the solvent and extracted with ethyl acetate and purified by column chromatography using dichloromethane. <sup>1</sup>H NMR (400 MHz, CDCl<sub>3</sub>) δ: 1.28 (m, 5H), 1.39 (m, 2H), 1.50 (m, 2H), 1.56 (m, 2H), 2.54 (m, 2H), 2.75 (m, 2H), 4.21 (q, 2H), 5.86 (brs, 2H). LC-MS: 254 (M+H)<sup>+</sup>.

**Compound 4:** Compound **3** was heated at 150°C in 5 mL formamide for 5 h. Upon cooling overnight, the product crystallized as slightly brownish crystals. The resulting crystals were collected and washed with a mixture of cold ethanol/water (1/1) to give the corresponding product in quantitative yield. <sup>1</sup>H NMR (400MHz, DMSO) δ: 1.27(m, 2H), 1.42 (m, 2H), 1.62(m, 4H), 2.87 (m, 2H), 3.06 (m, 2H), 8.5 (s, 1H), 11.4 (brs, 1H). LC-MS: 234.9 (M+H)<sup>+</sup>.

**Compound 5:** Compound **4** was dissolved in hot DMF and then ice-cooled prior to the addition of POCl<sub>3</sub> (2 equivalents). Upon stirring overnight, the product precipitated out as white solid **5**, which was collected and washed with cold water and used for next step without purification.

1197

1198

1199

1200

1201

1202

1203

1204

1205

1206

**Compound 7:** Compound **5** was dissolved in methanol and then added 10 equivalent of hydrazine monohydrate. The mixture was stirred for 2 h and water was added. The resulting precipitate was filtered off and washed with cold water to obtain compound **6**, which was then treated with 1.2 equivalent of vanillin. The mixture was stirred for 2 h, diluted with water and extracted with dichloromethane. The organic layer was dried with MgSO<sub>4</sub>, filtered off and concentrated in vacuo and purified by column chromatography using ethyl acetate: hexane (4:6). <sup>1</sup>H NMR (400MHz, DMSO) δ: 1.27 (m, 2H), 1.46 (m, 2H), 1.62 (m, 2H), 1.68 (m, 2H), 2.85 (m, 2H), 3.19 (m, 2H), 3.88 (s, 3H), 6.84 (d, 1H), 7.60 (d, 1H), 7.79 (s, 1H), 8.30 (s, 1H), 9.45 (brs, 1H) 11.70 (brs, 1H). <sup>13</sup>C NMR: <sup>13</sup>C NMR (100 MHz, DMSO) δ

1207 149.29, 148.97, 148.47, 146.76, 146.41, 141.11, 135.01, 132.59, 122.39, 118.77,  
1208 117.05, 116.46, 113.05, 58.20, 56.24, 26.95, 25.84, 25.72, 25.50. LC-MS: 383  
1209 (M+H)<sup>+</sup>.

## 1210 **Imaging, Analysis and Statistics**

1211 The quantification of endocytic uptake for a population is done by imaging on 20x,  
1212 0.75 NA on a Nikon TE300 wide field inverted microscope. For the stretch  
1213 experiments, an upright microscope (Nikon eclipse Ni –U) was used with a water  
1214 immersion objective (60x, 1.0 NA). Different fields were obtained and cells within  
1215 the field were outlined as regions using either metamorph or micromanager software.  
1216 The images were analyzed using MetaMorph<sup>®</sup> or Micro-Manager software and is  
1217 processed for presentation using Adobe Illustrator. All images displayed are equally  
1218 scaled for intensity unless otherwise mentioned. The scale bar is 10μm unless  
1219 otherwise mentioned. The integrated intensities, spread area and thus average uptake  
1220 per cell were determined using the region measurement option. Each value plotted  
1221 here is mean value from two different experiments with duplicates in each and  
1222 standard deviation between the two experiments. Statistical significance was tested  
1223 using Mann-Whitney test and p-values are reported.

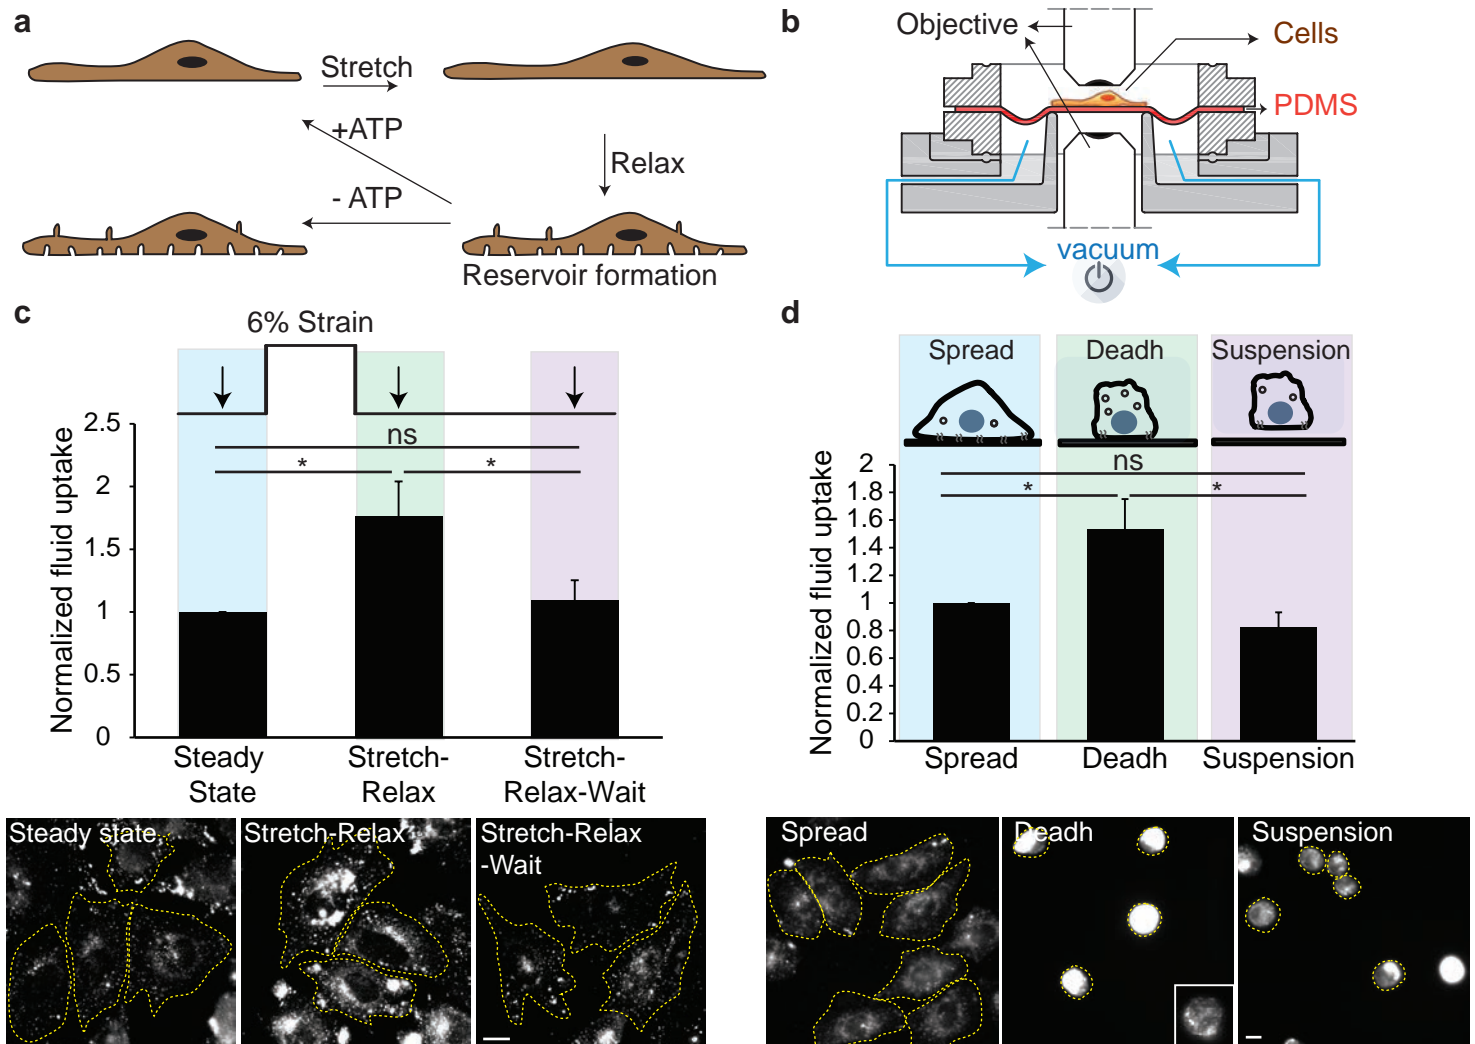

FIGURE 1

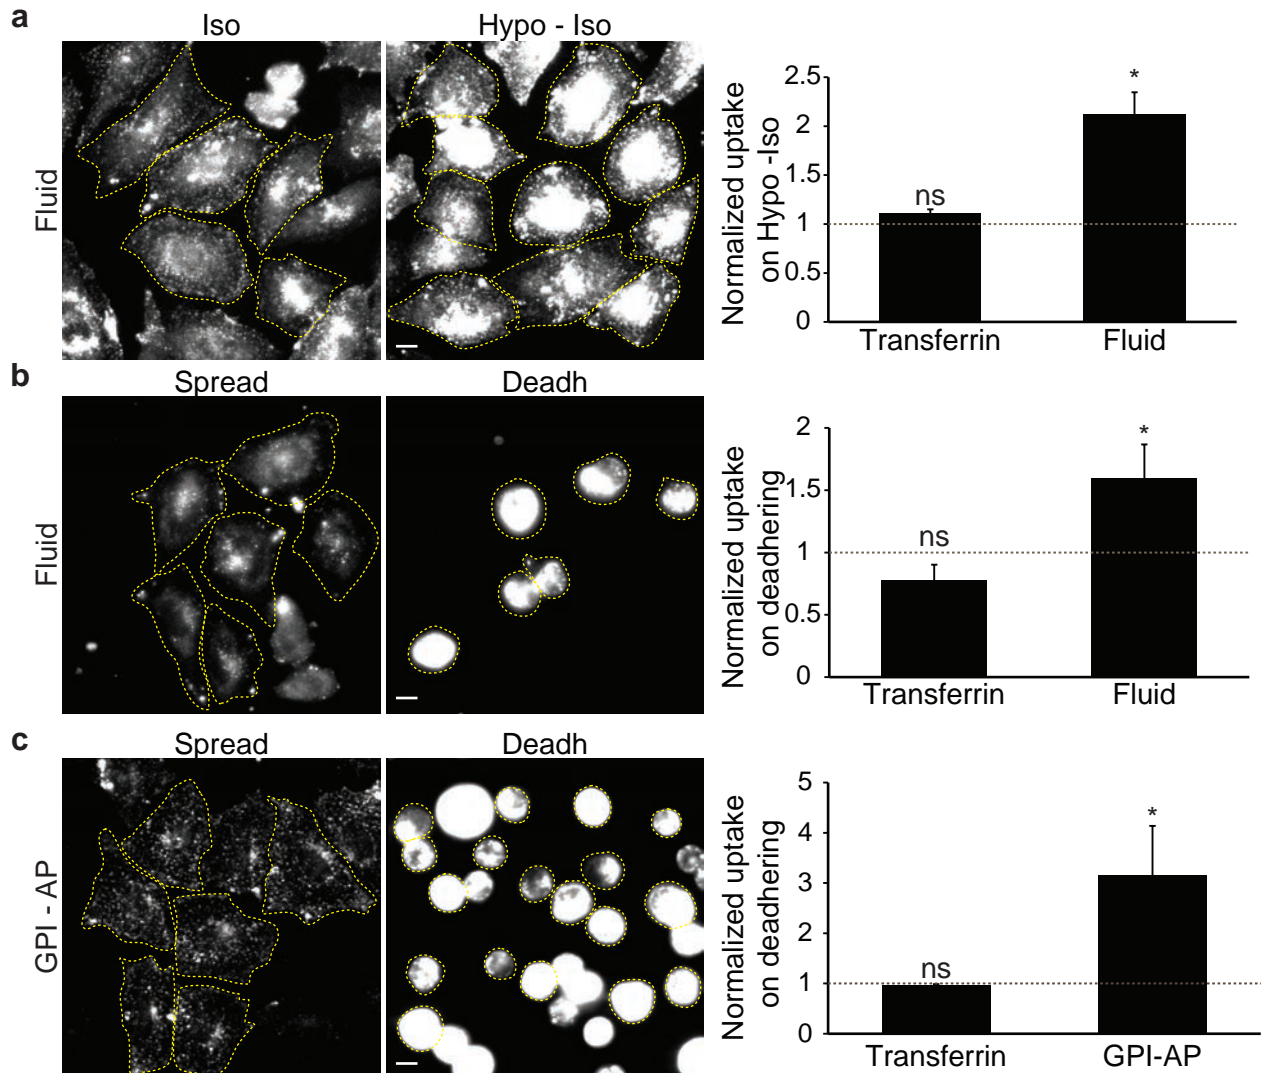



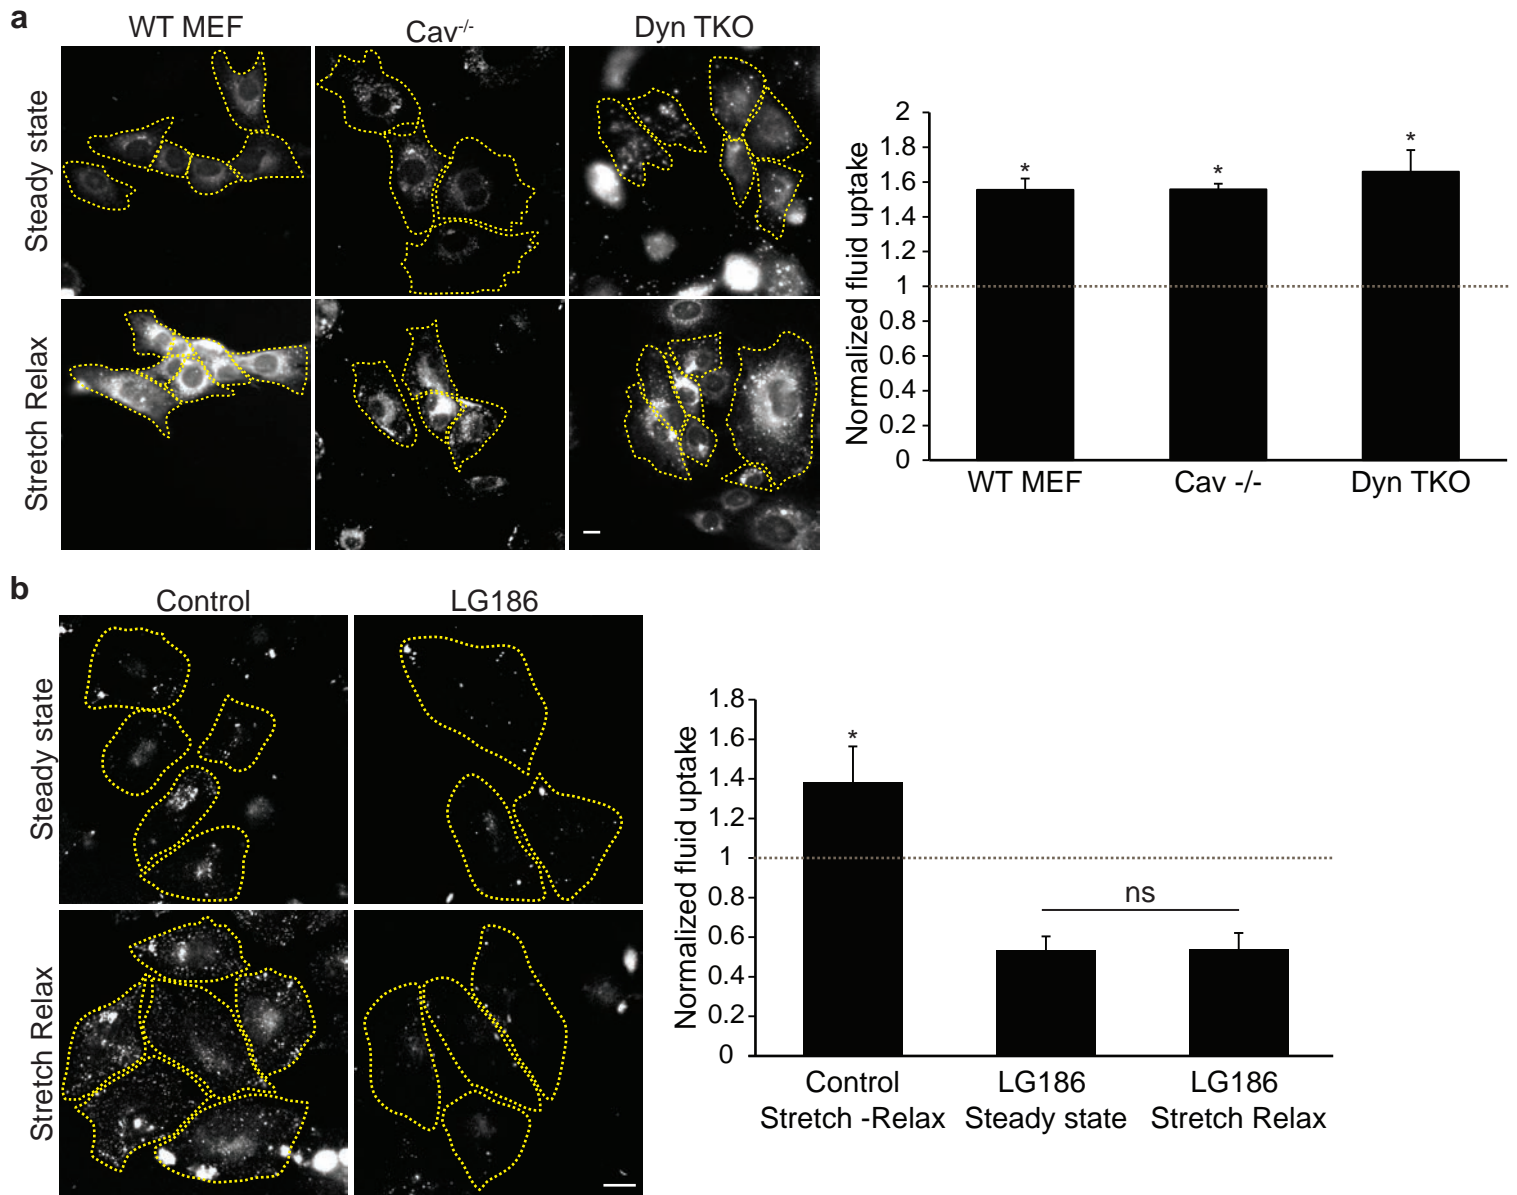

FIGURE 3

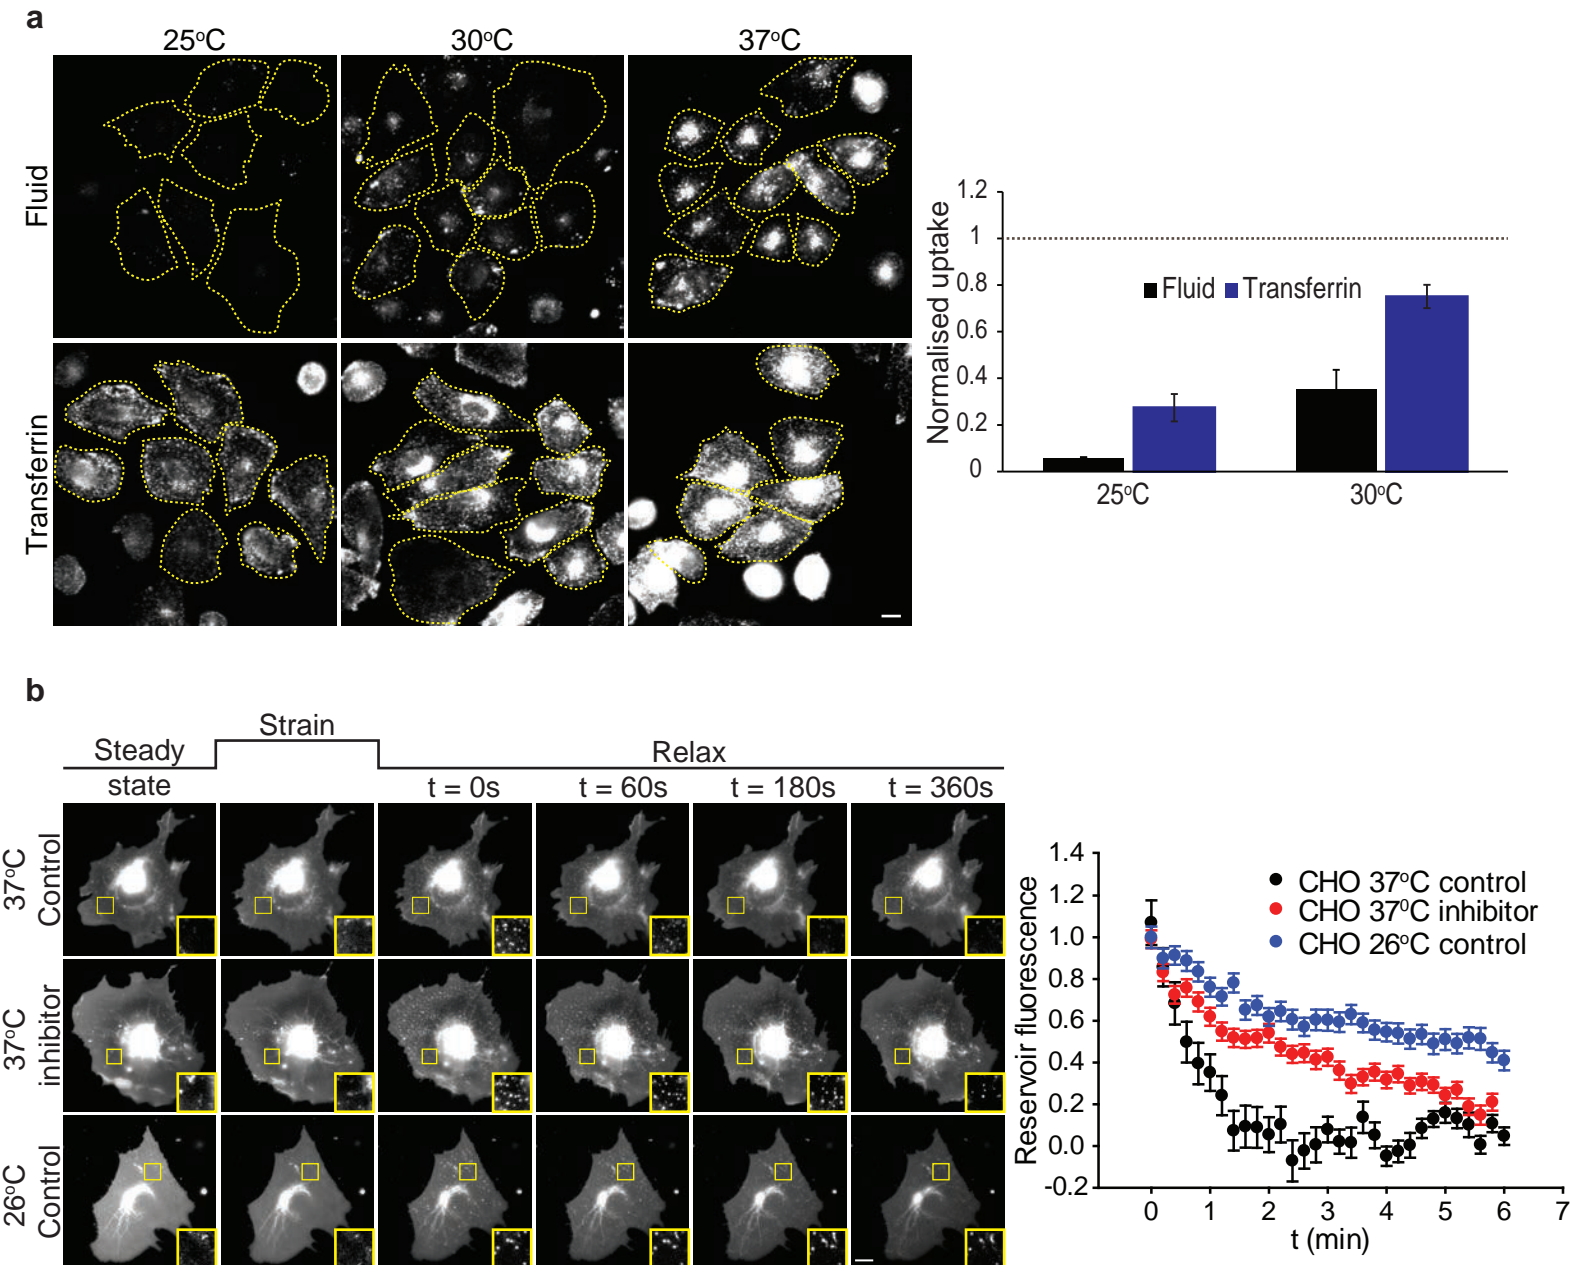

FIGURE 4

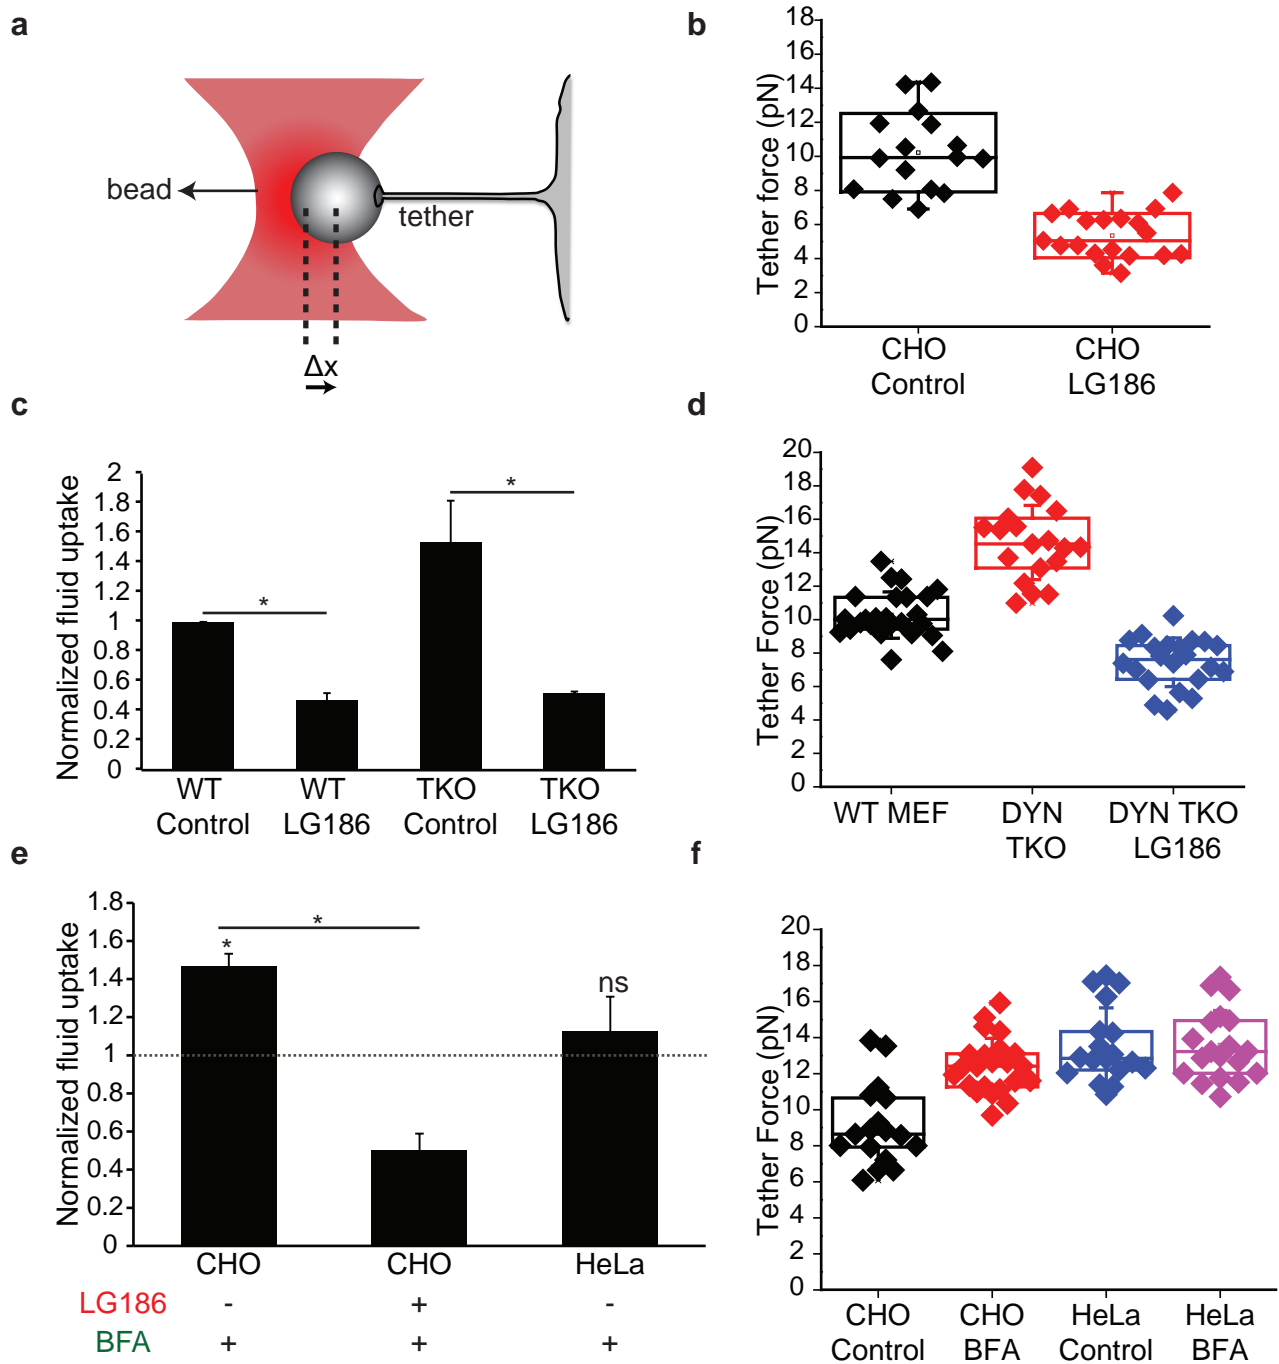

FIGURE 5

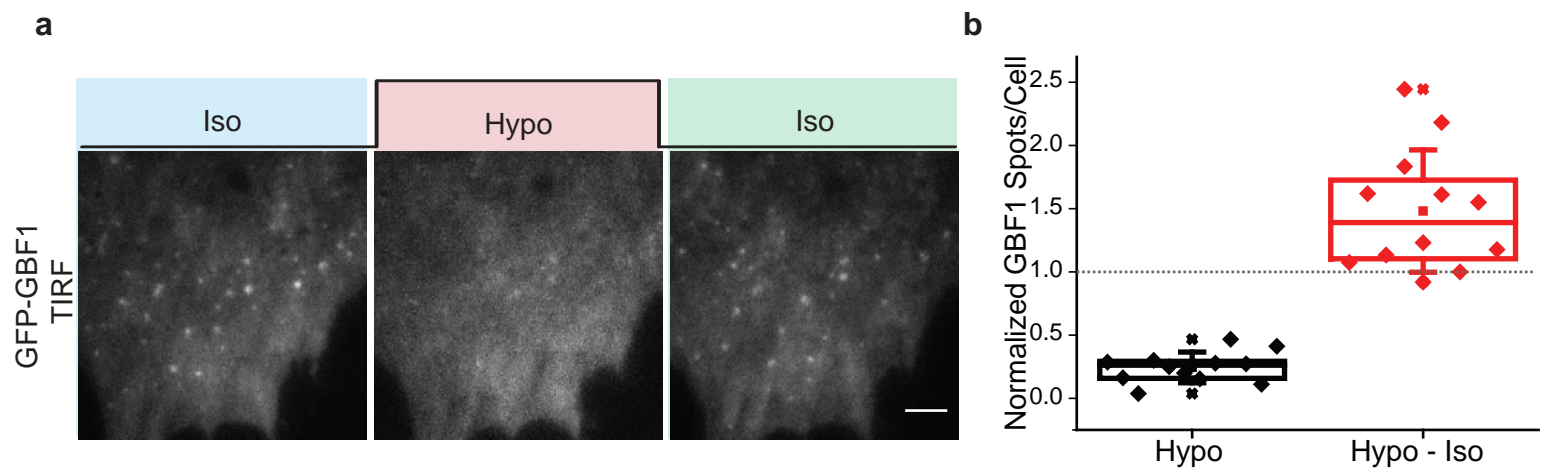

FIGURE 6

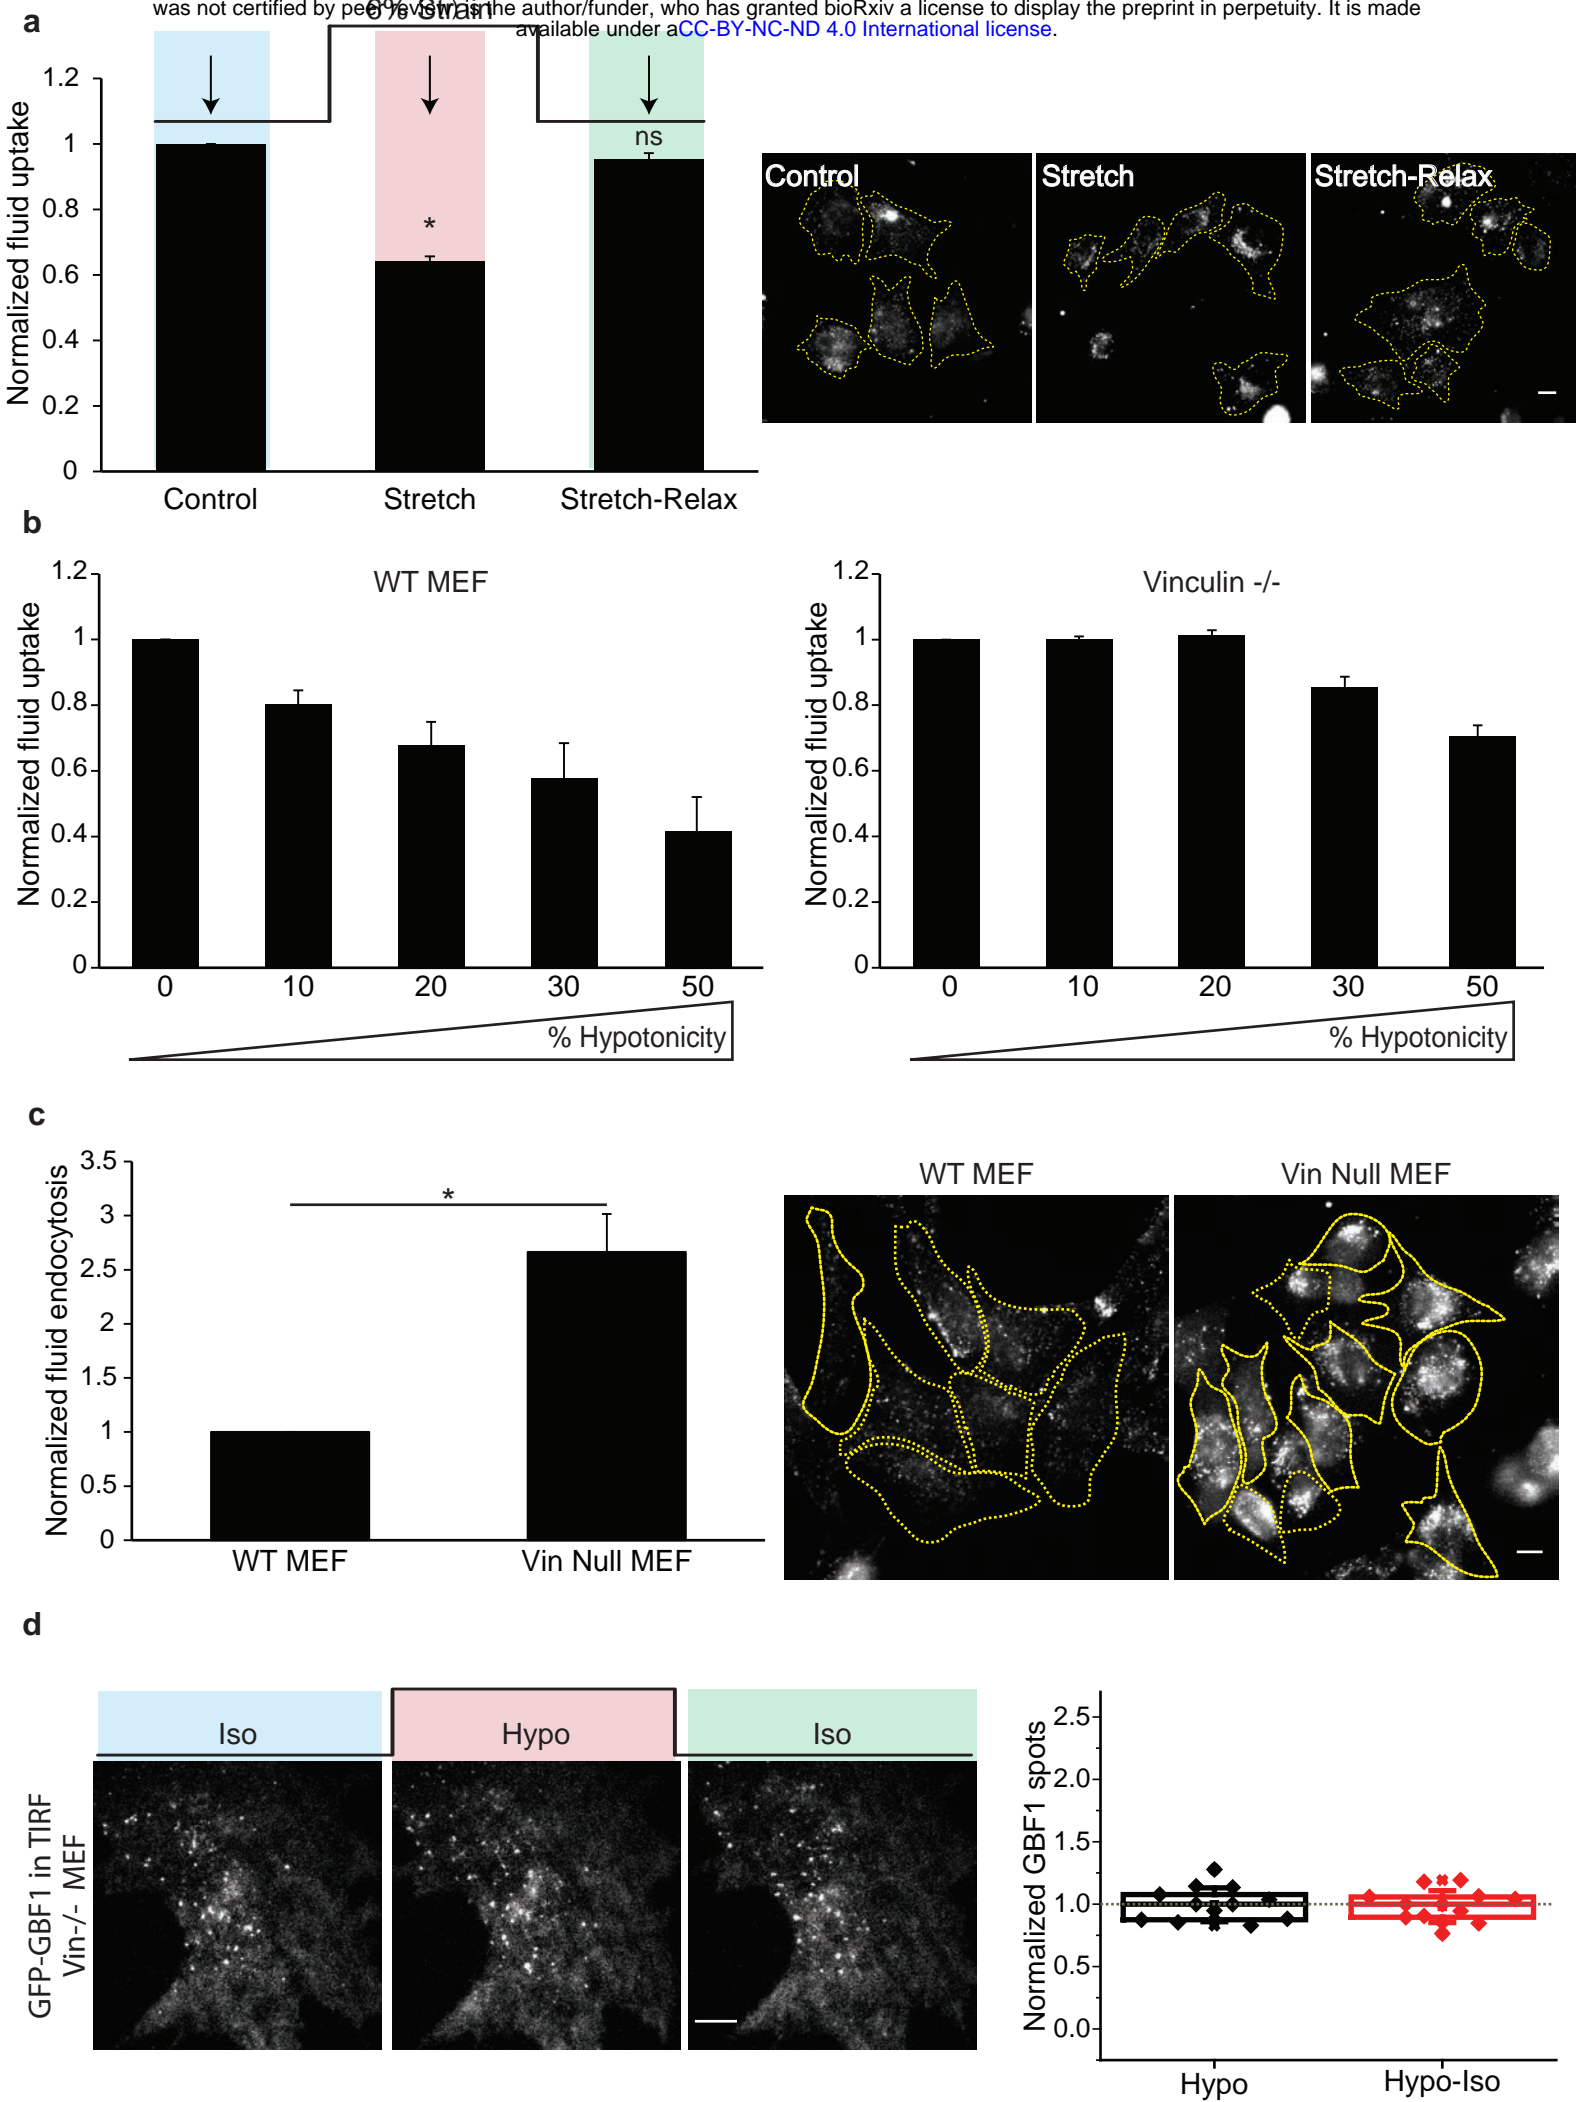

FIGURE 7

**a**

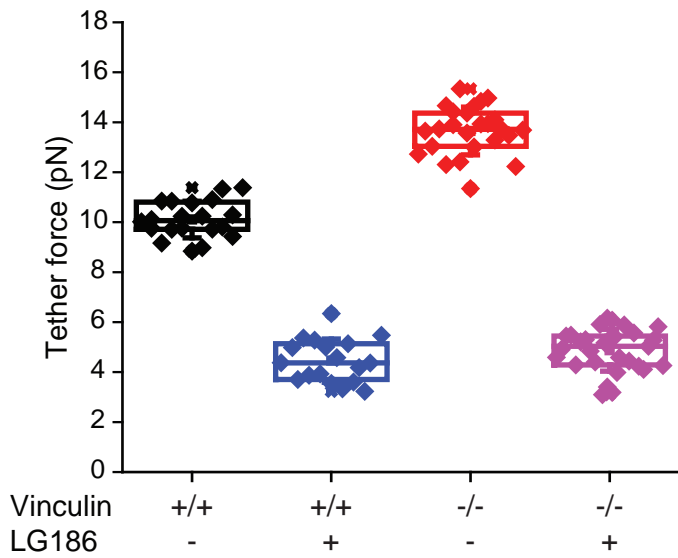

**b**

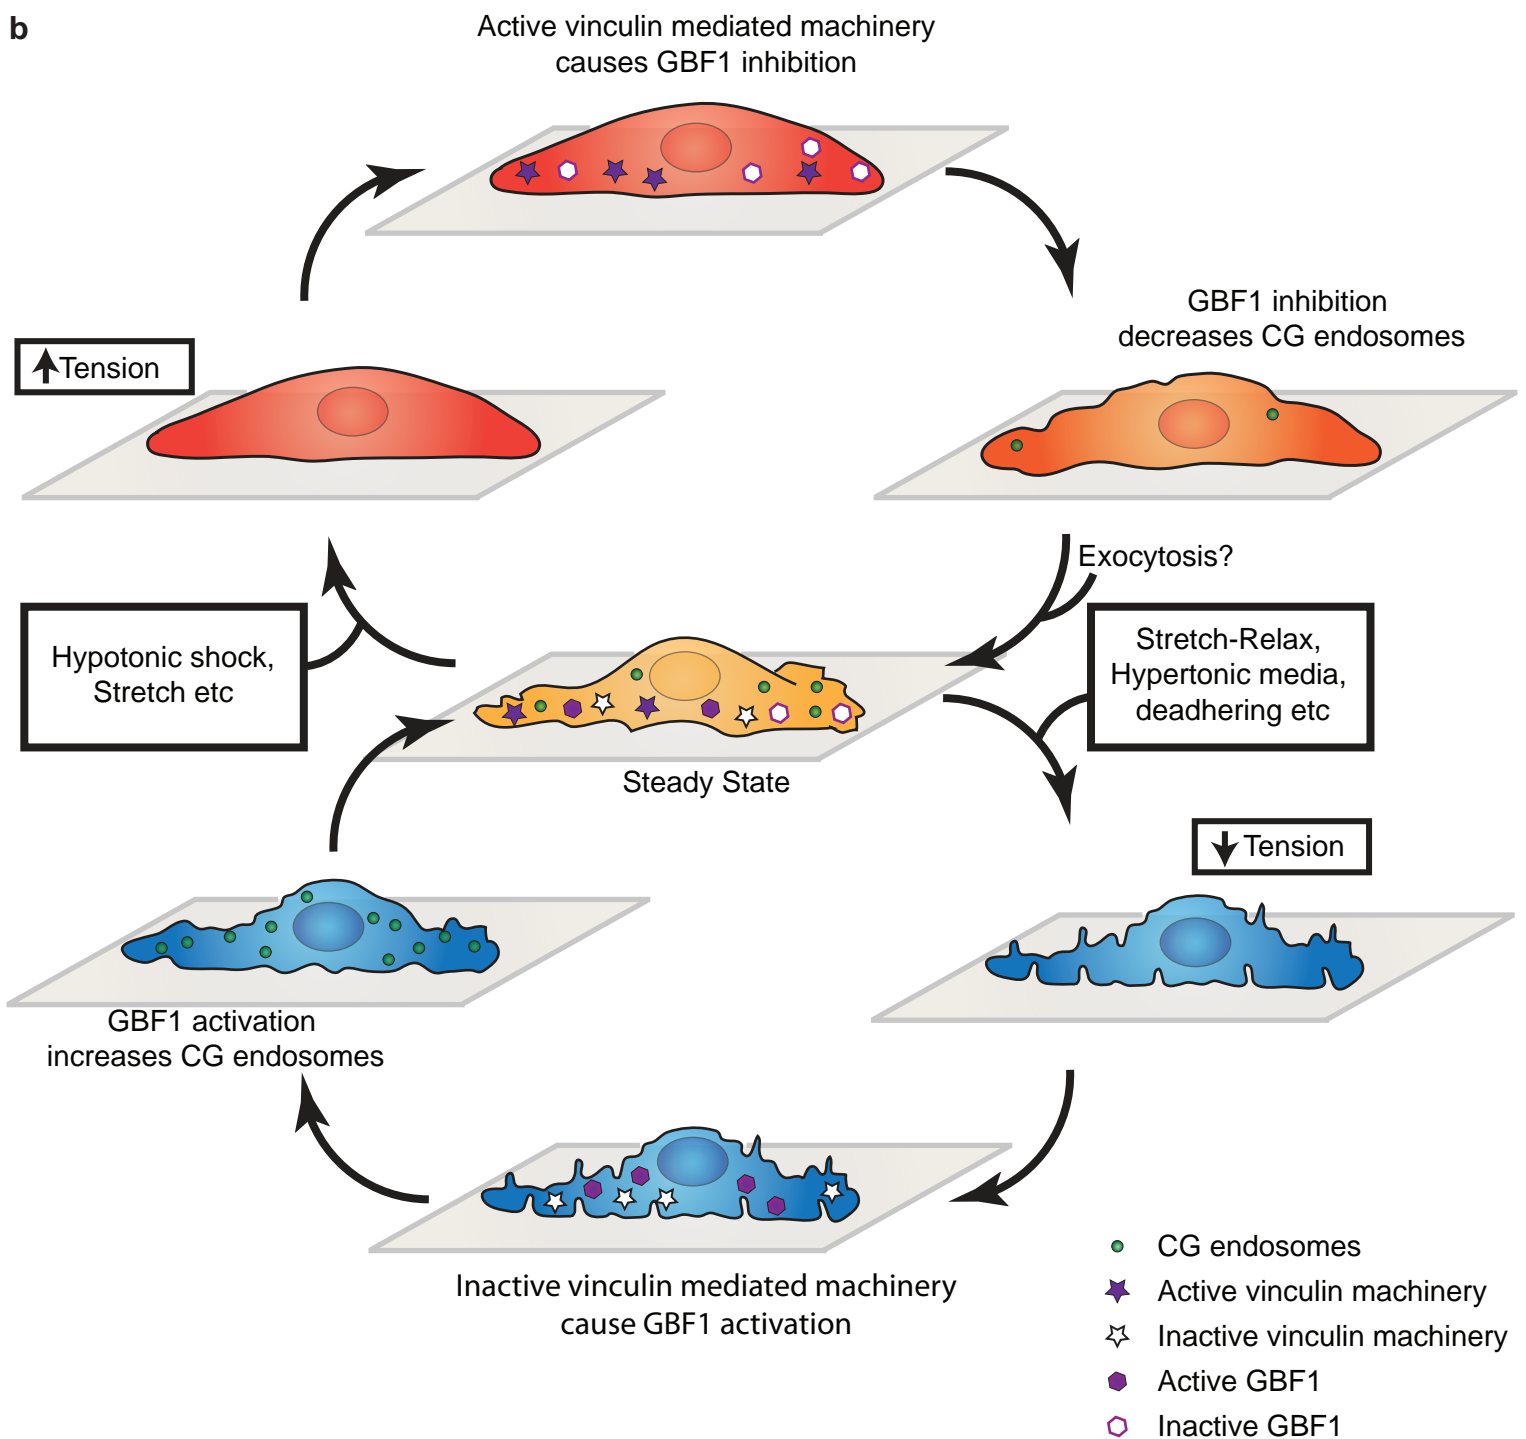

FIGURE 8

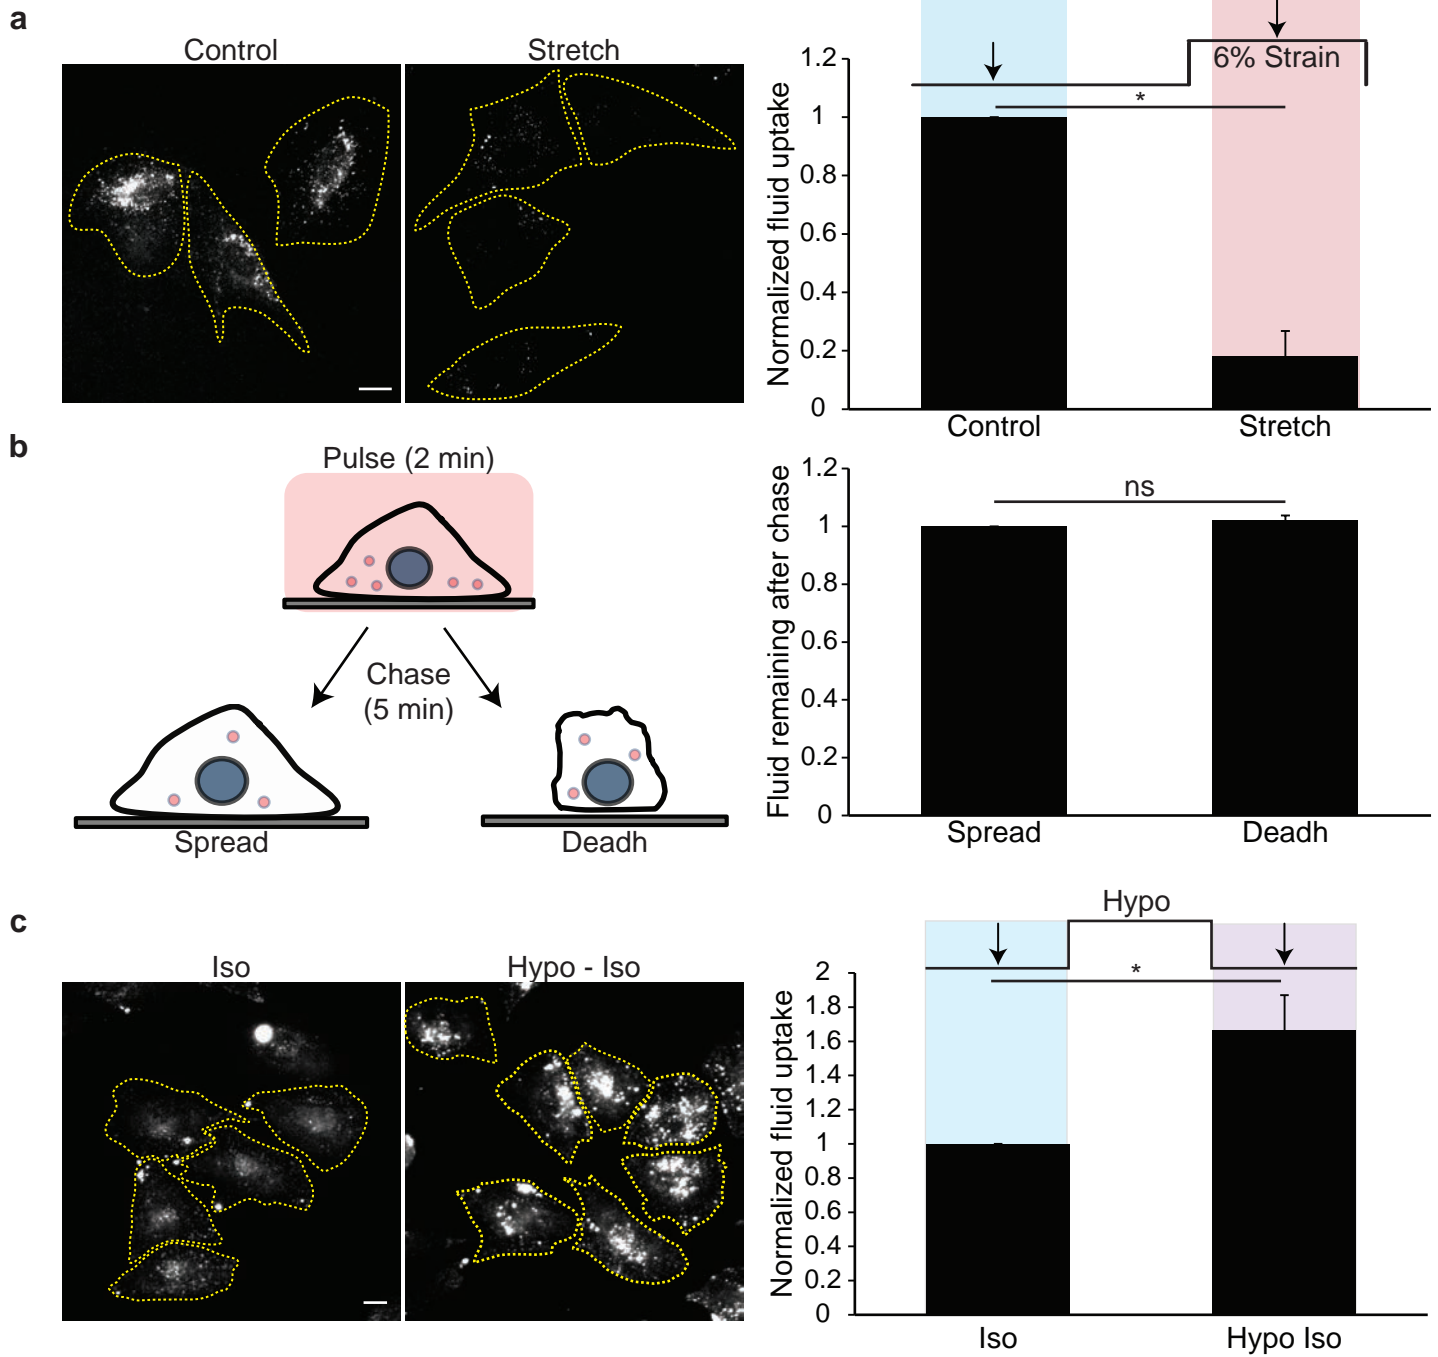

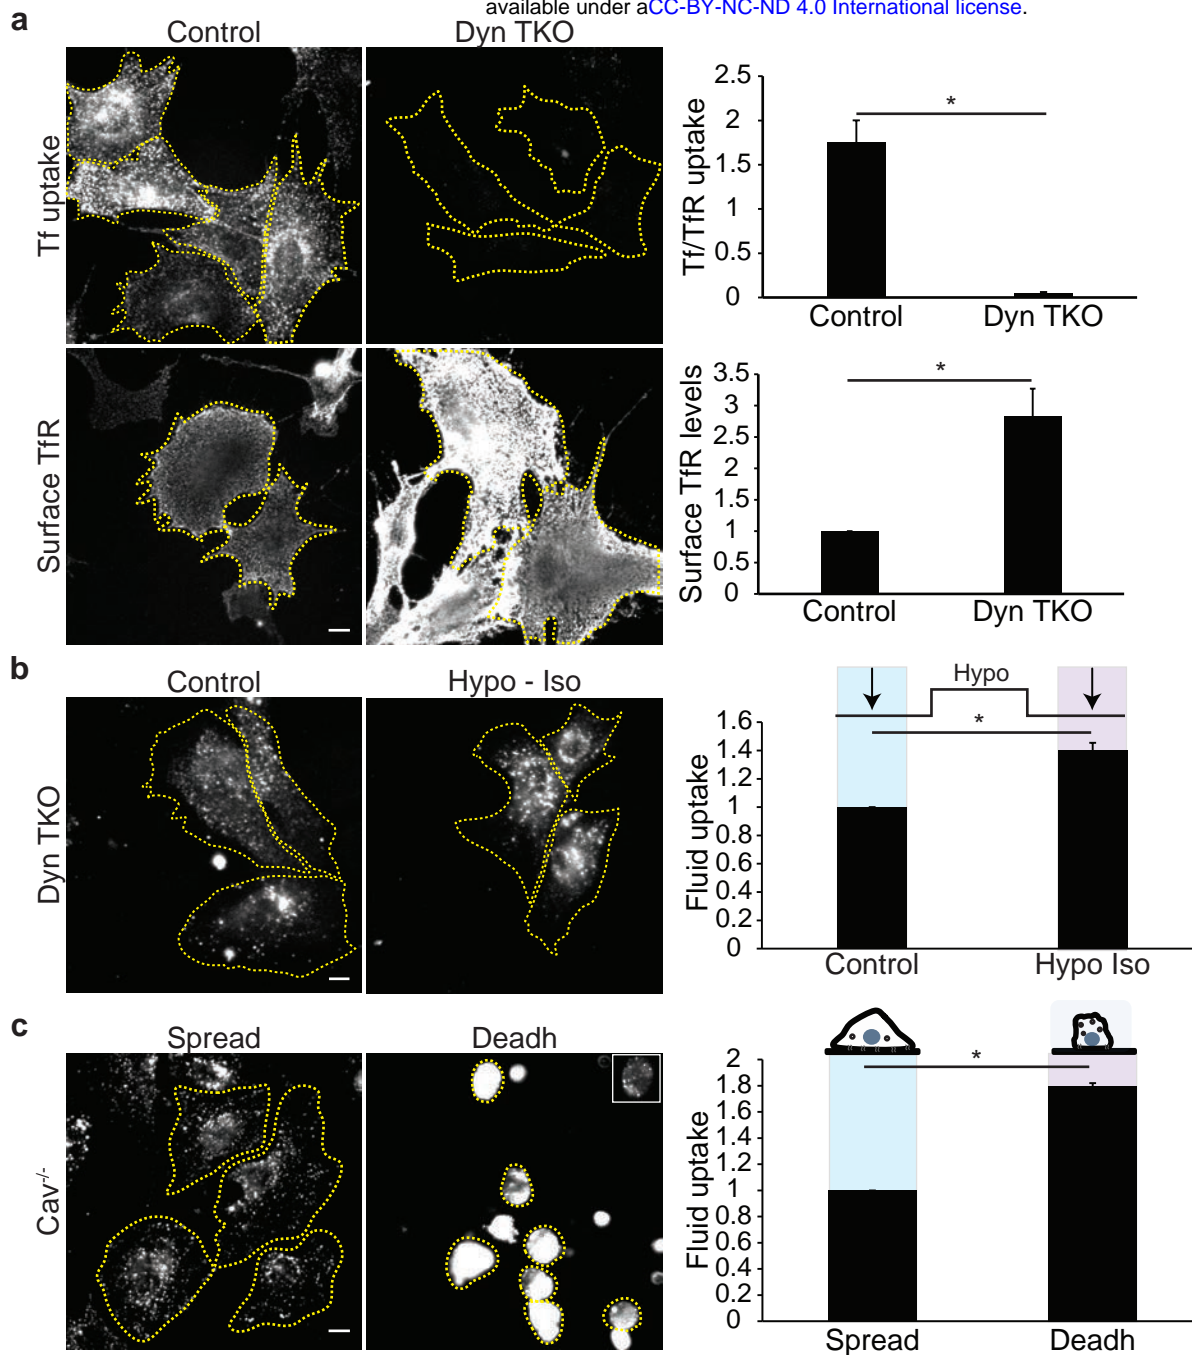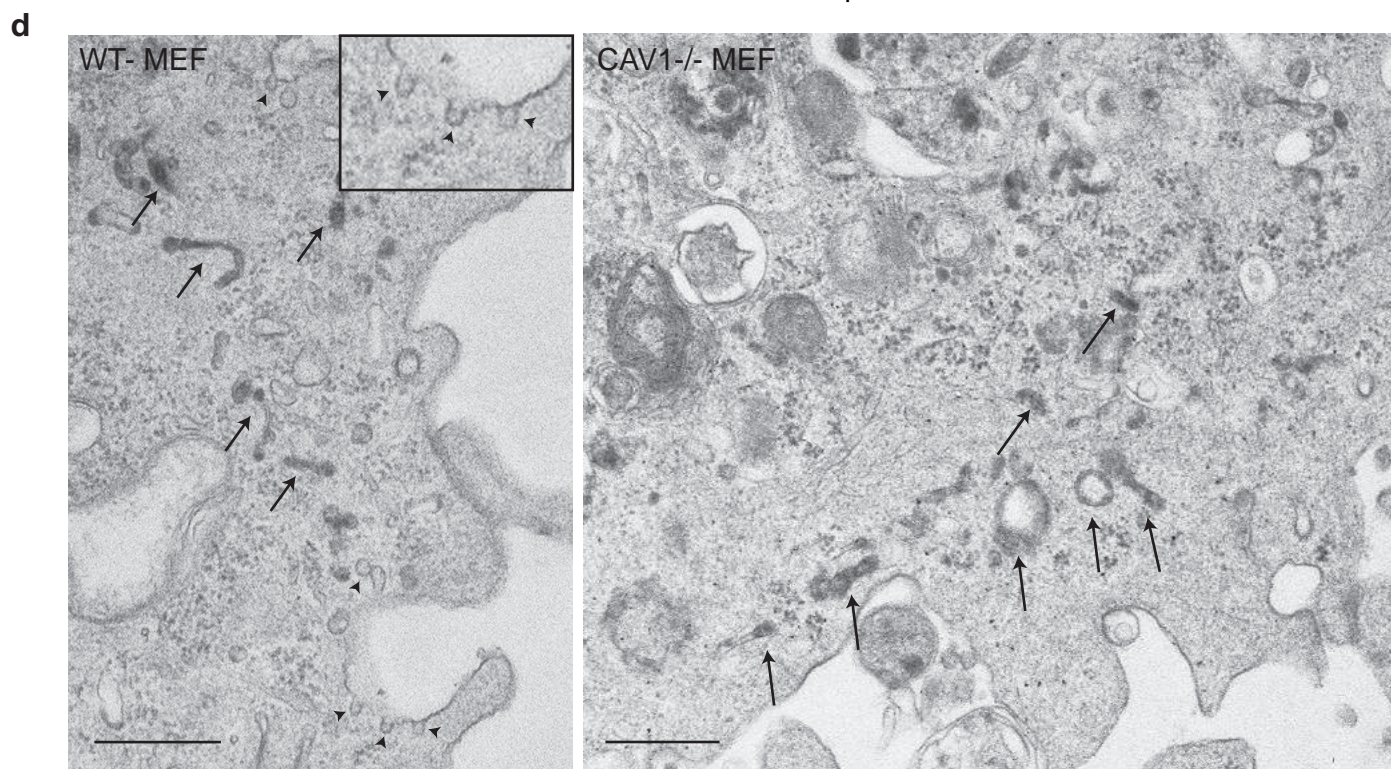

SUPPLEMENTARY FIGURE 2



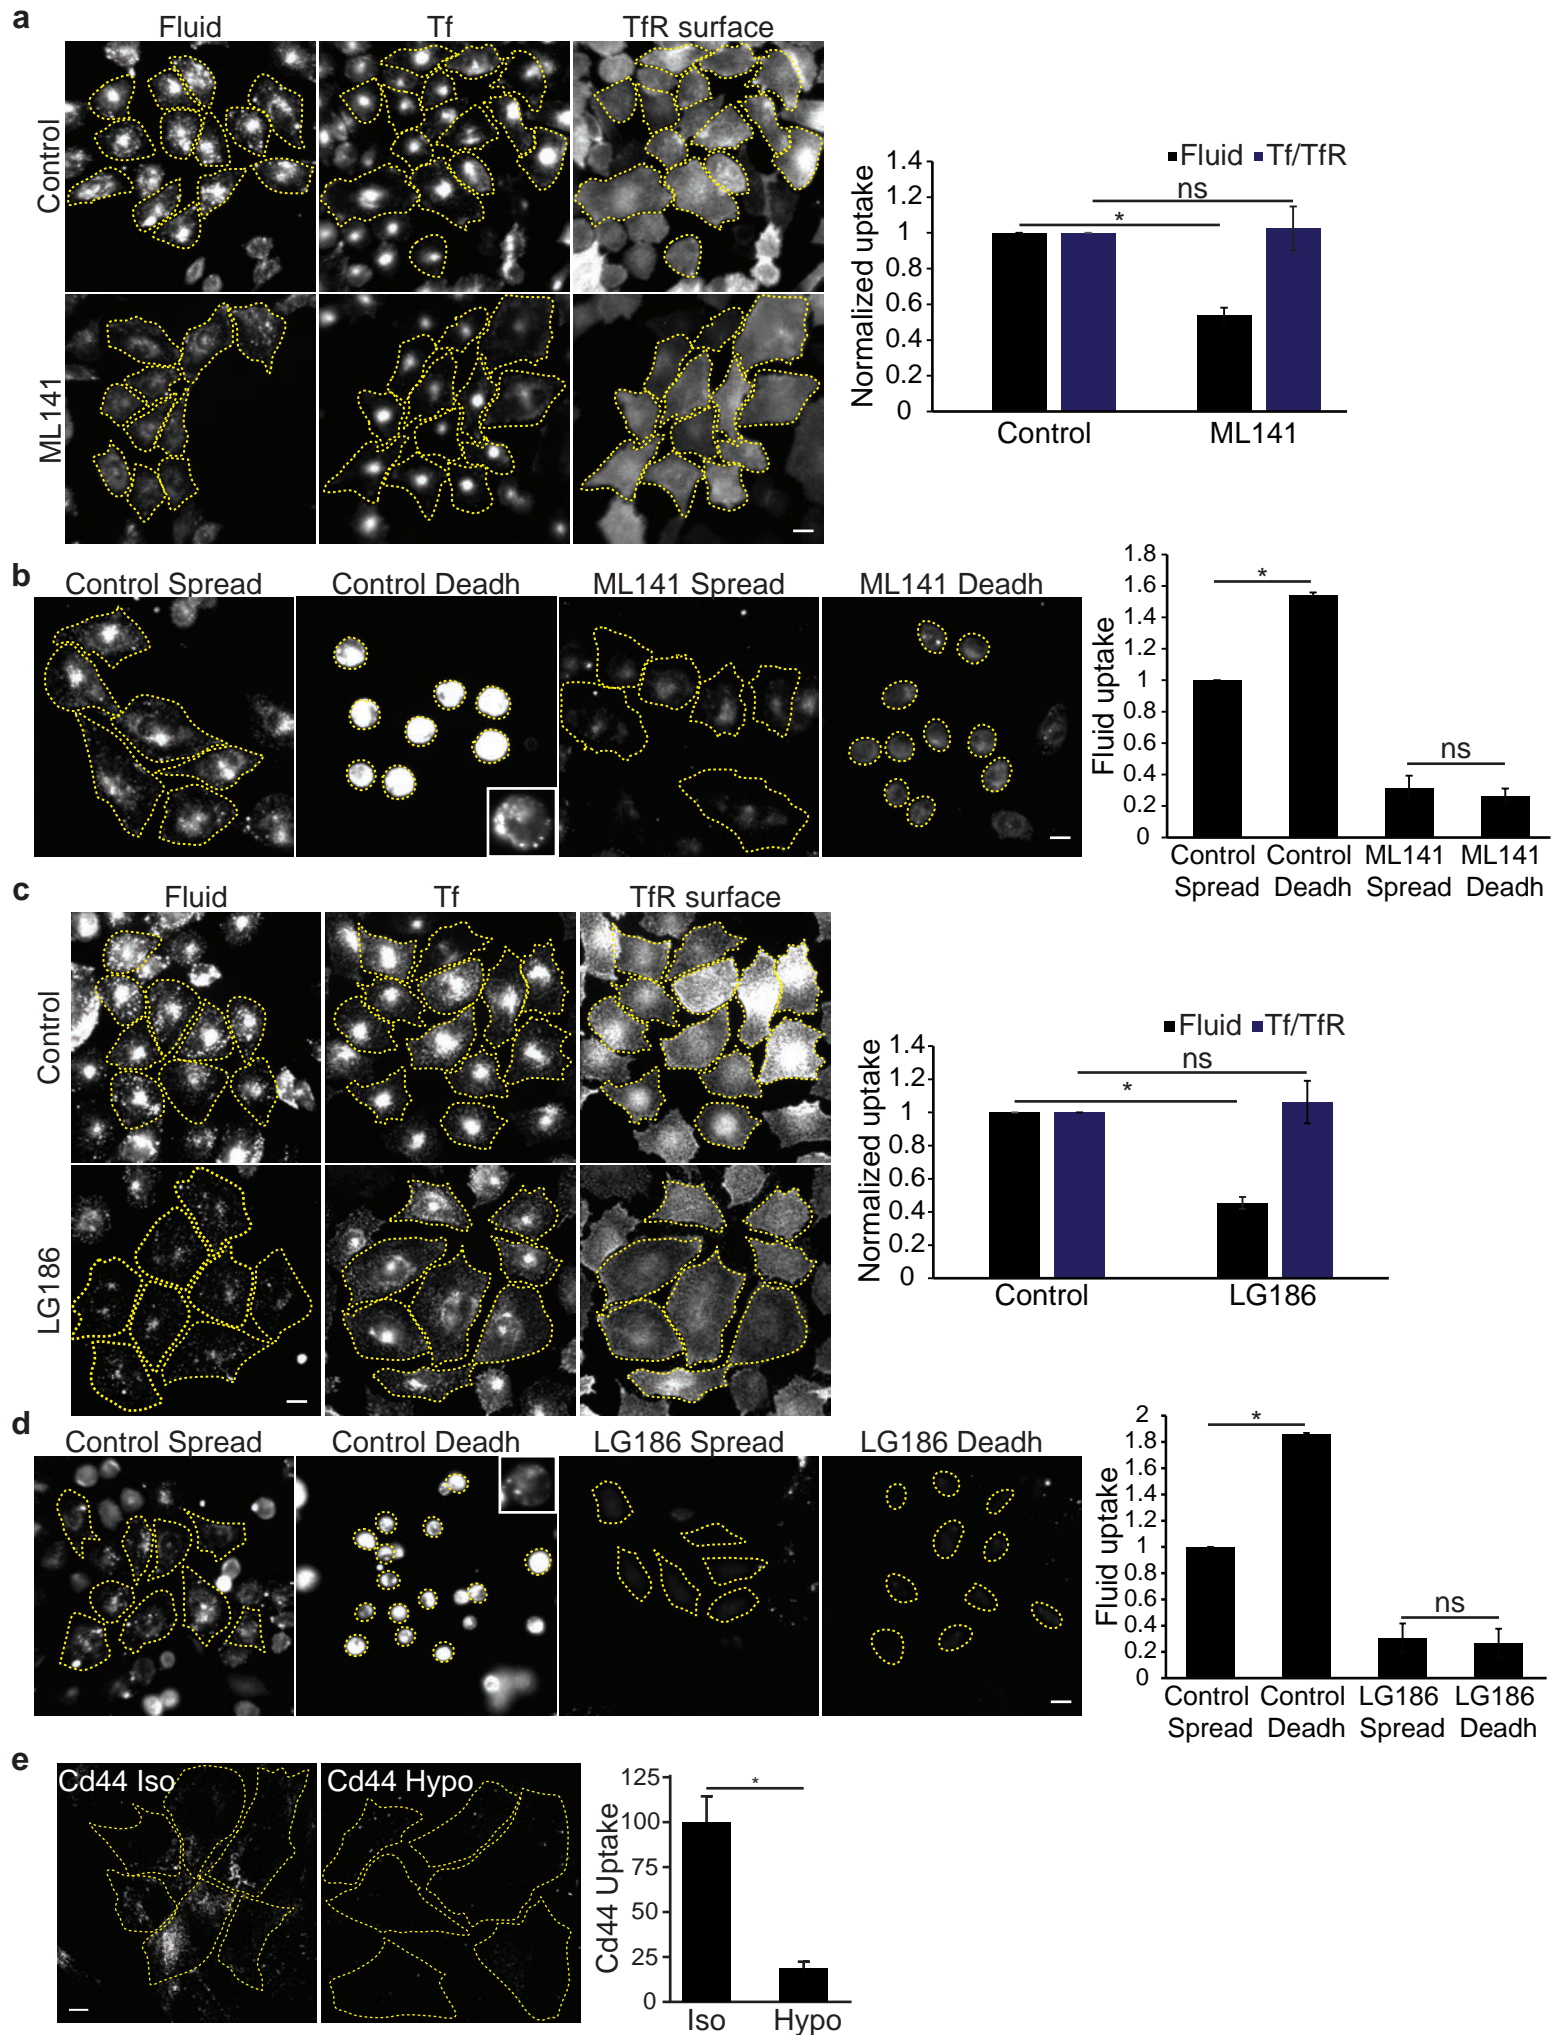

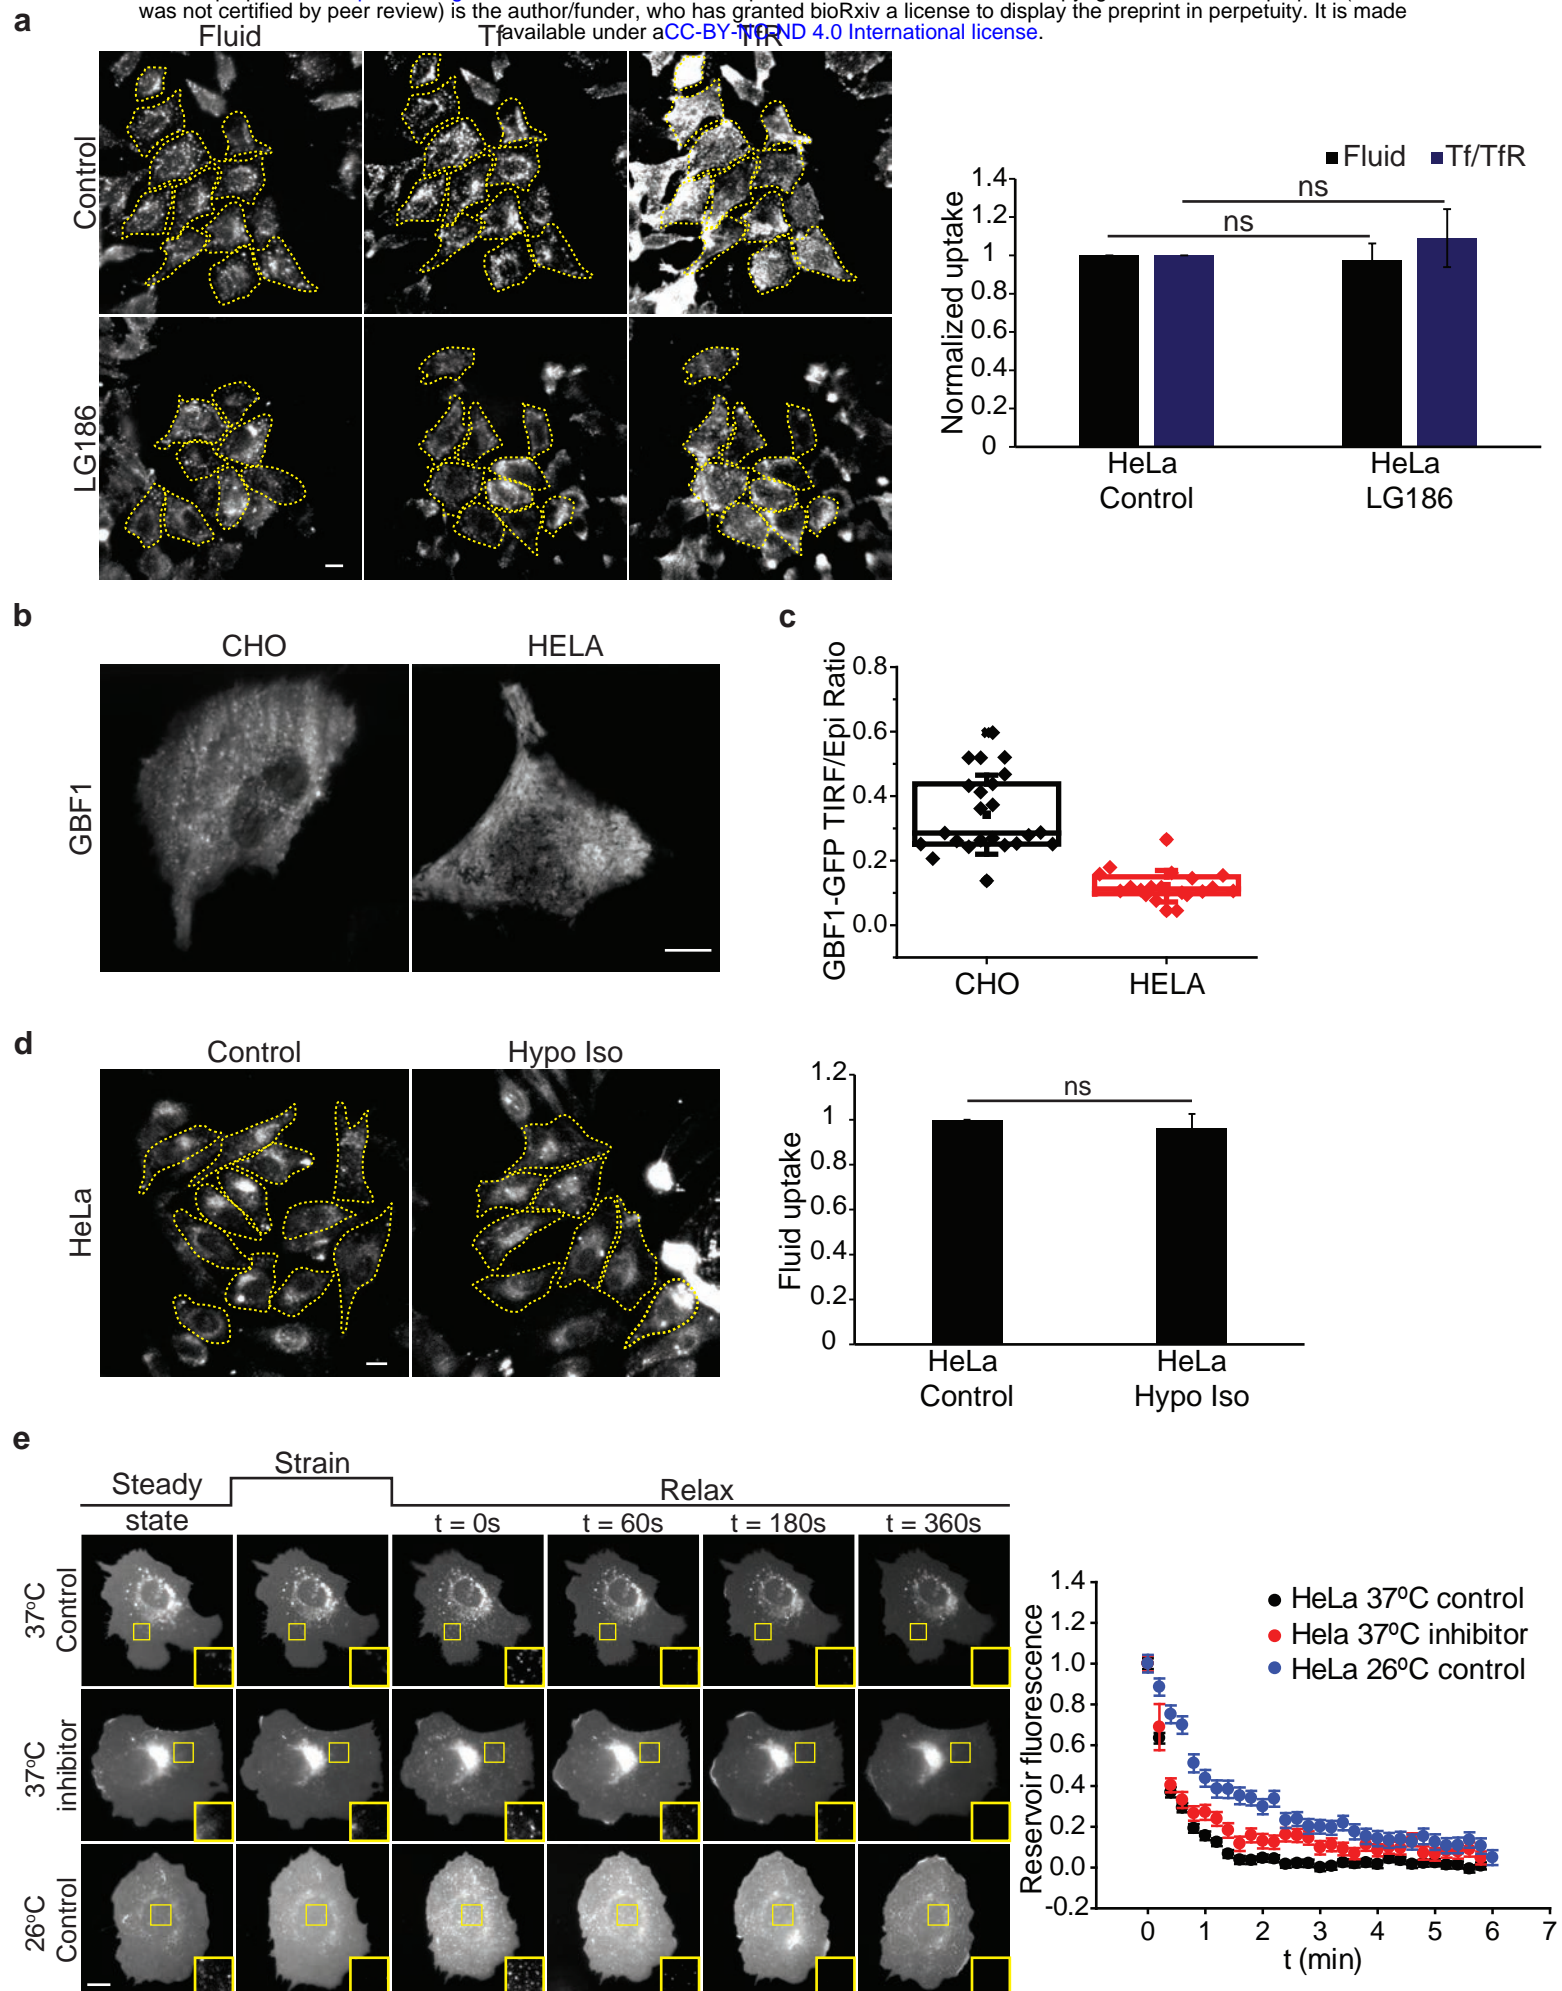

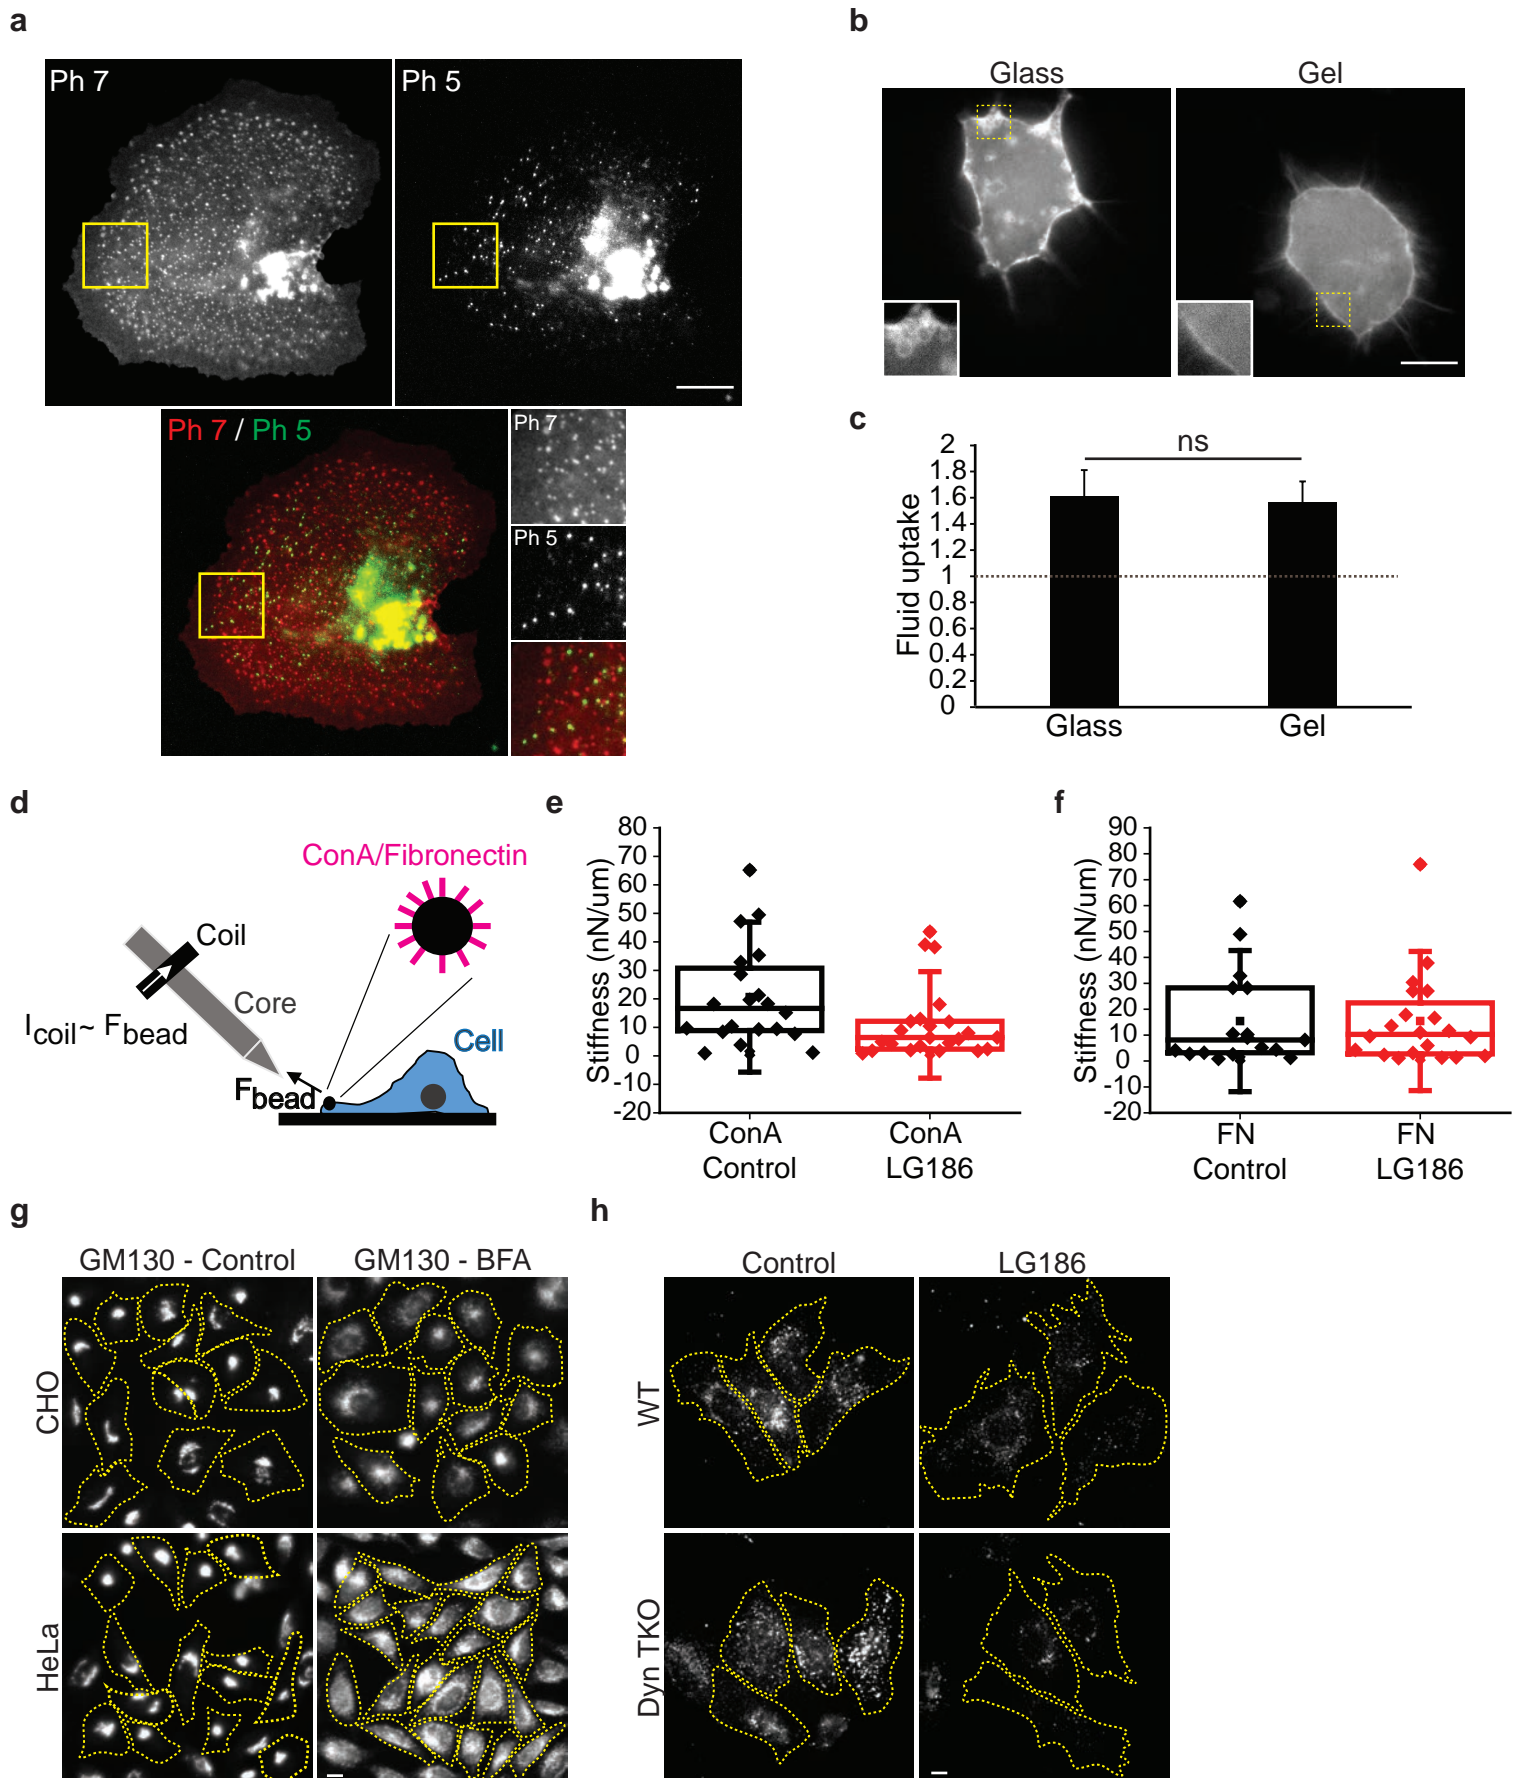

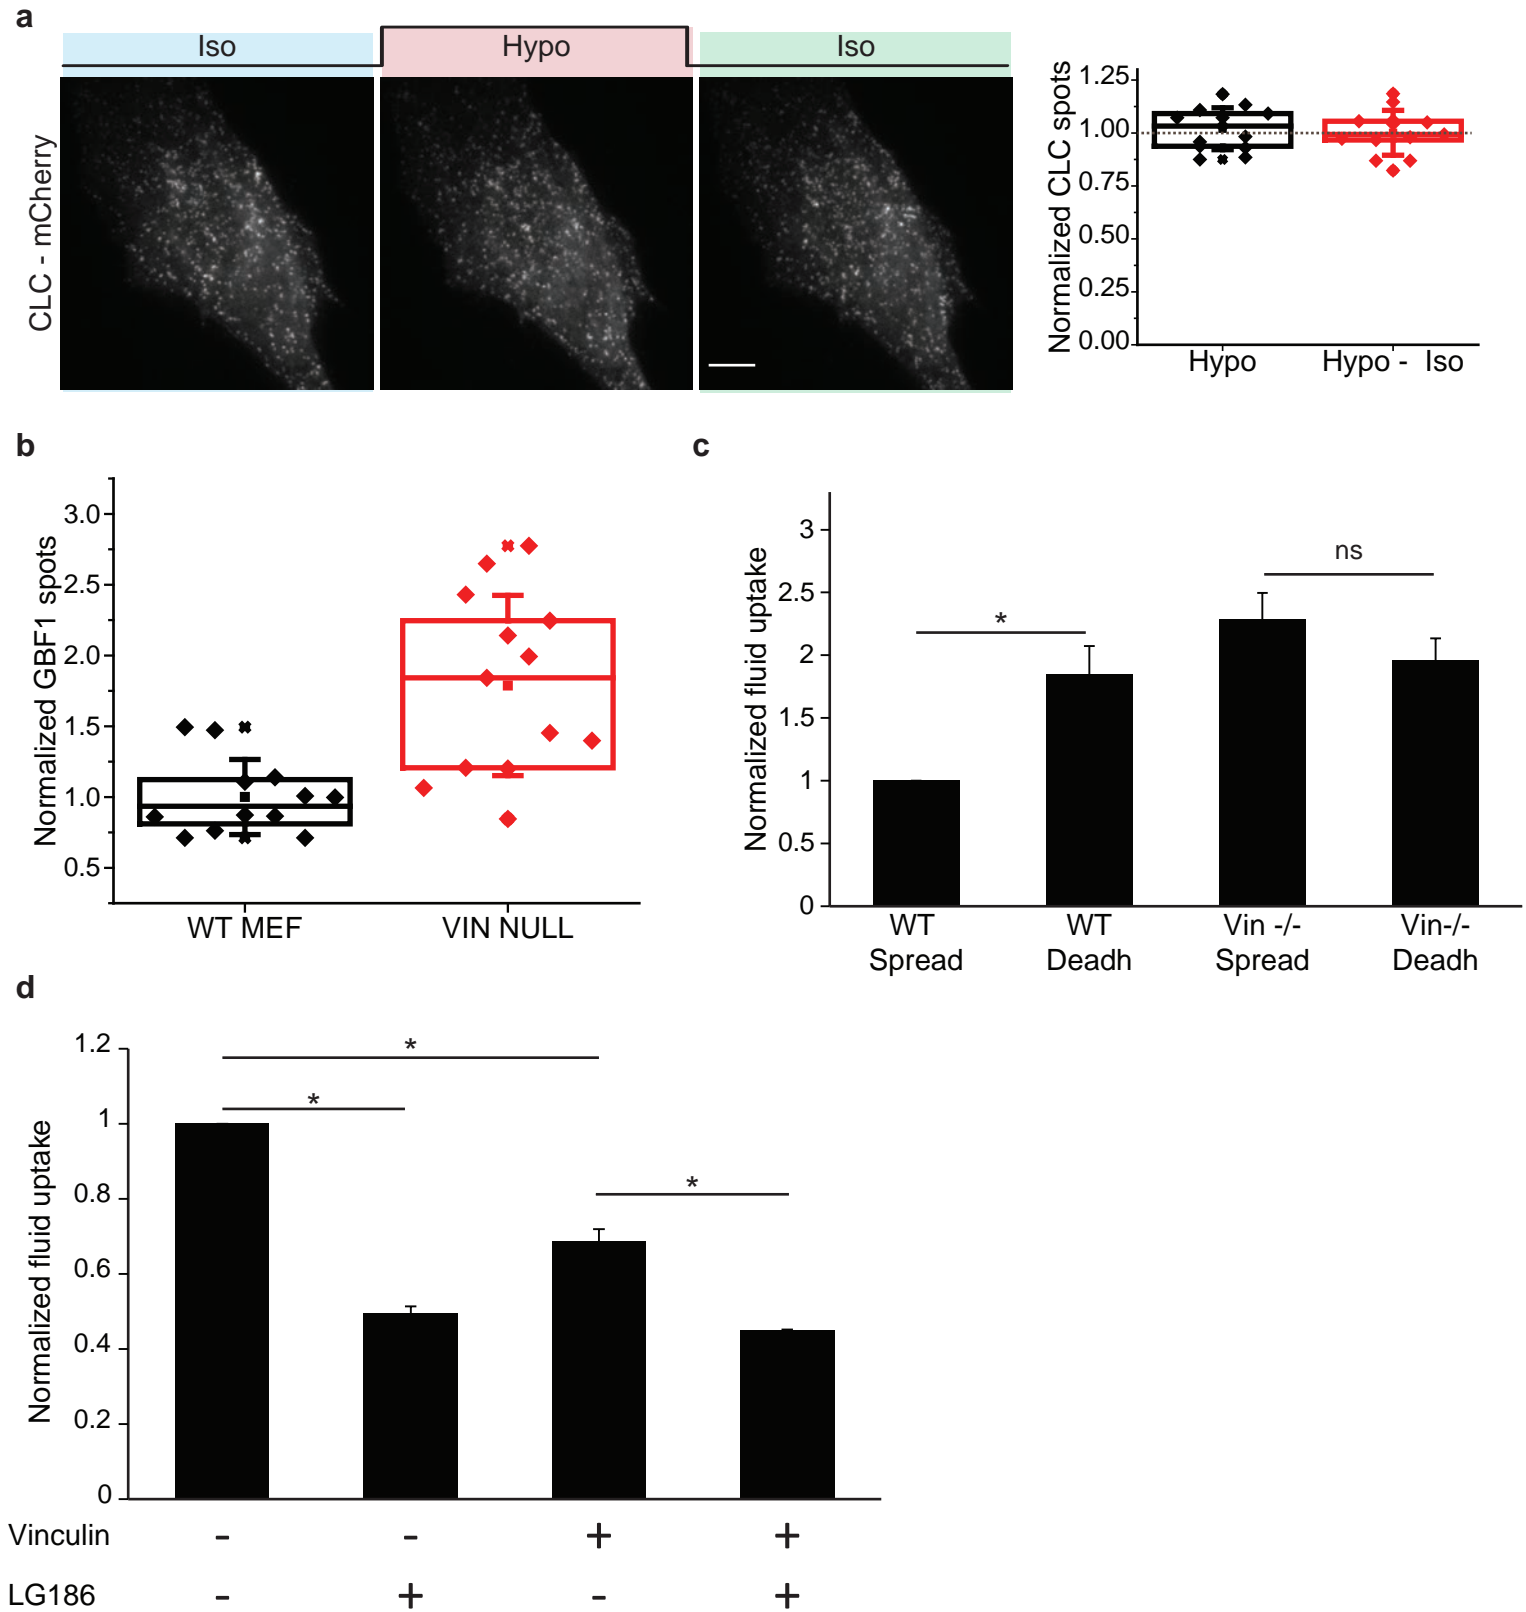

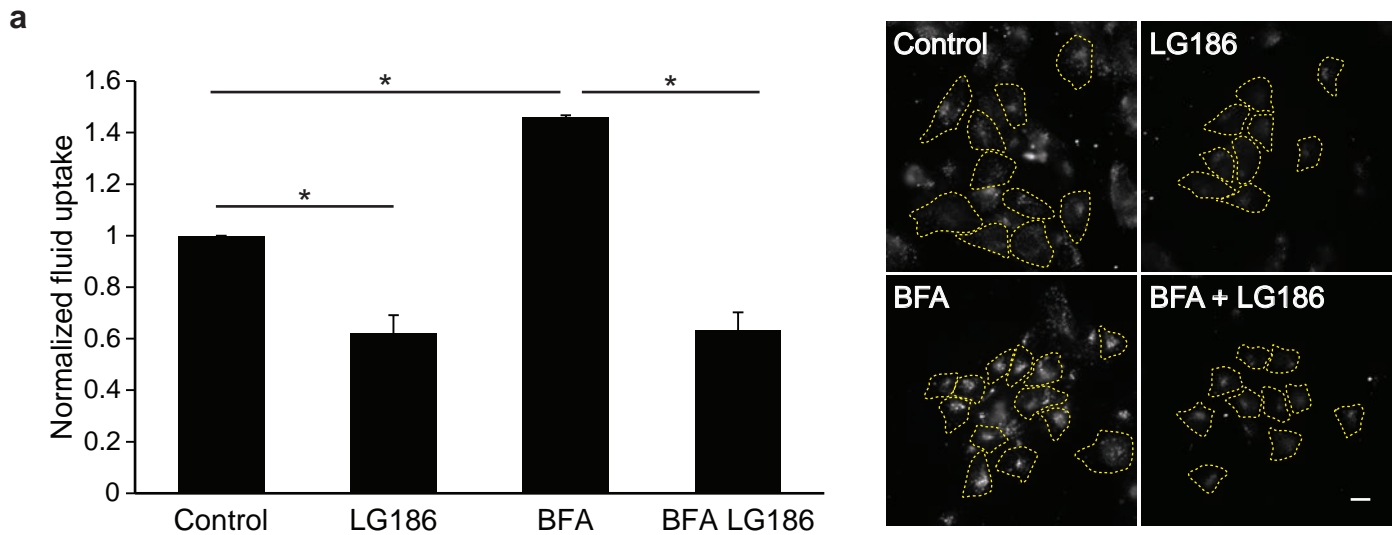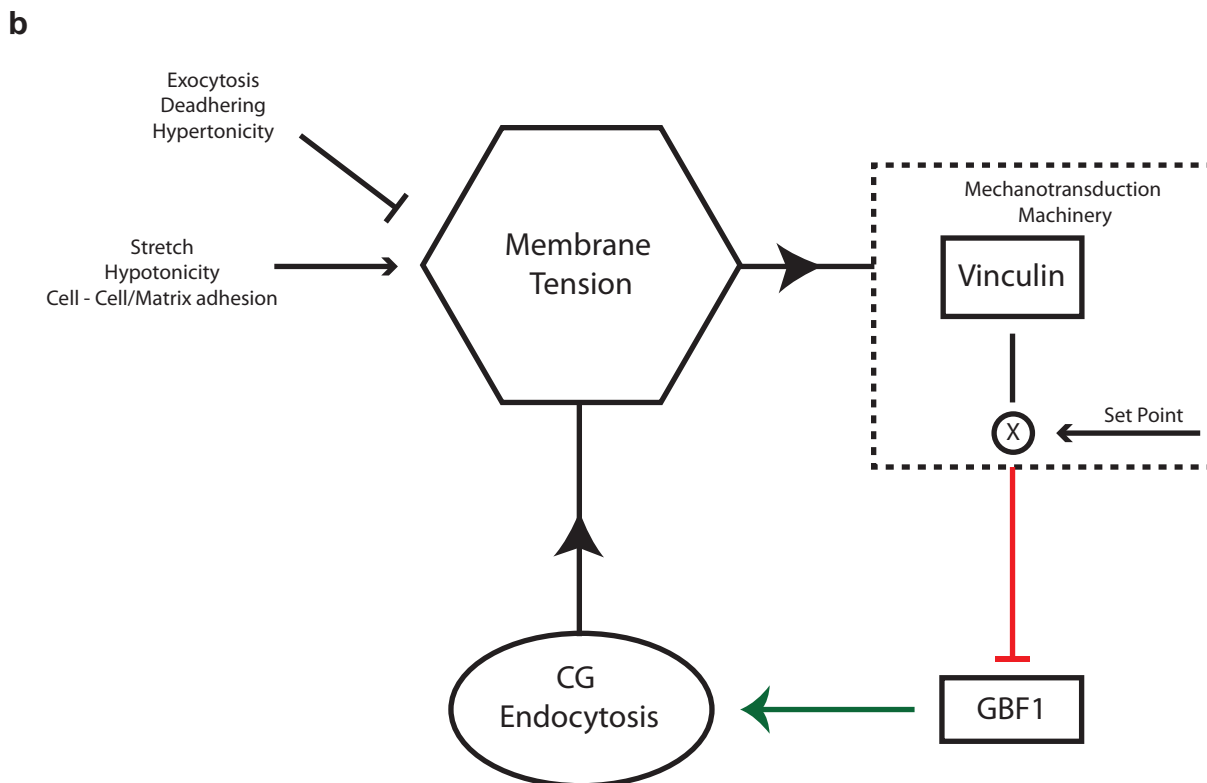

Source: http://www.biorxiv.org/content/10.1101/201509v1.full.pdf
